# Supplementary material
Source: publisher figshare collection journal article supplement (https://rs.figshare.com/ndownloader/files/22790732)
Supplement: Supplementary file 1 [file 22790732]

**Electronic supplementary material: *Franzén et al. Urban moth communities suggest that life in the city favours thermophilic multi-dimensional generalists***

**Electronic supplementary table S1**. The studied species, their taxonomic affinity (family), occurrence in each of the three cities/regions, and information on eight ecological traits (for details see ‘Description of the trait variables’ in supplementary material below). NA – indicates that the species did not occur in the city nor in the regional species pool. The species are sorted alphabetically after family and species name.

| ***Taxonomic family*** | ***Species name*** | ***Halle*** | ***Kalmar*** | ***Lund*** | ***Body size*** | ***Range size*** | ***Length of reproductive season*** | ***Dietary breadth*** | ***Colour pattern variation*** | ***Temperature preference*** | ***Habitat use*** | ***Overwintering life-stage.*** |
| --- | --- | --- | --- | --- | --- | --- | --- | --- | --- | --- | --- | --- |
| Brahmaeidae | *Lemonia dumi* | 0 | 0 | 0 | 48.5 | 25 | 4 | 3 | 0 | 3.5 | Open | Larva |
| Cossidae | *Acossus terebra* | NA | 0 | NA | 62.5 | 19 | 2 | 1 | 0 | 13.0 | Forest | Larva |
| Cossidae | *Cossus cossus* | 1 | 0 | 0 | 76.5 | 32 | 5 | 3 | 0 | 11.2 | Generalist | Larva |
| Cossidae | *Phragmataecia castaneae* | 0 | 0 | NA | 34.5 | 30 | 5 | 2 | 0 | 11.2 | Generalist | Larva |
| Cossidae | *Zeuzera pyrina* | 1 | 0 | 1 | 55 | 33 | 6 | 3 | 0 | 11.7 | Generalist | Larva |
| Drepanidae | *Achlya flavicornis* | 0 | 0 | 0 | 38.5 | 23 | 3 | 3 | 1 | 3.0 | Forest | Pupa |
| Drepanidae | *Cilix glaucata* | 0 | 0 | 0 | 36.5 | 31 | 9 | 2 | 0 | 9.7 | Generalist | Pupa |
| Drepanidae | *Cymatophorina diluta* | 0 | 0 | 0 | 32.5 | 25 | 4 | 2 | 1 | 7.3 | Forest | Egg |
| Drepanidae | *Drepana curvatula* | 0 | 0 | 0 | 34.5 | 22 | 9 | 3 | 1 | 9.7 | Forest | Pupa |
| Drepanidae | *Drepana falcataria* | 1 | 0 | 0 | 27 | 29 | 9 | 3 | 1 | 9.7 | Forest | Pupa |
| Drepanidae | *Falcaria lacertinaria* | 1 | 0 | 0 | 41.5 | 27 | 9 | 3 | 1 | 9.7 | Forest | Pupa |
| Drepanidae | *Habrosyne pyritoides* | 1 | 0 | 1 | 37 | 30 | 8 | 3 | 0 | 11.1 | Generalist | Pupa |
| Drepanidae | *Ochropacha duplaris* | 0 | 0 | 0 | 37 | 26 | 9 | 3 | 1 | 10.8 | Forest | Pupa |
| Drepanidae | *Polyploca ridens* | 0 | 0 | 1 | 34.5 | 25 | 4 | 2 | 1 | 5.5 | Forest | Pupa |
| Drepanidae | *Sabra harpagula* | 0 | 0 | 0 | 34.5 | 24 | 5 | 1 | 0 | 11.2 | Forest | Pupa |
| Drepanidae | *Tethea ocularis* | 1 | 0 | 0 | 39.5 | 31 | 3 | 2 | 0 | 9.0 | Forest | Pupa |
| Drepanidae | *Tethea or* | 1 | 1 | 1 | 37 | 28 | 7 | 3 | 2 | 10.1 | Forest | Pupa |
| Drepanidae | *Tetheella fluctuosa* | 0 | 0 | 0 | 37 | 22 | 5 | 2 | 2 | 11.2 | Forest | Pupa |
| Drepanidae | *Thyatira batis* | 1 | 0 | 0 | 37 | 32 | 10 | 3 | 0 | 10.4 | Generalist | Pupa |
| Drepanidae | *Watsonalla binaria* | 1 | 1 | 1 | 33 | 28 | 10 | 2 | 1 | 8.6 | Forest | Pupa |
| Drepanidae | *Watsonalla cultraria* | 0 | 0 | 0 | 28.5 | 24 | 9 | 2 | 1 | 9.7 | Forest | Pupa |
| Endromidae | *Endromis versicolora* | 0 | 0 | 0 | 69 | 25 | 6 | 3 | 0 | 4.5 | Forest | Pupa |
| Erebidae | *Arctia aulica* | 0 | 0 | 0 | 36 | 21 | 2 | 3 | 0 | 10.1 | Open | Larva |
| Erebidae | *Arctia caja* | 0 | 1 | 0 | 64 | 29 | 9 | 3 | 2 | 11.4 | Generalist | Larva |
| Erebidae | *Arctia plantaginis* | 0 | 0 | 0 | 37.5 | 29 | 6 | 3 | 1 | 10.7 | Open | Larva |
| Erebidae | *Arctornis l-nigrum* | 0 | 0 | 0 | 52.5 | 27 | 16 | 3 | 0 | 11.2 | Forest | Larva |
| Erebidae | *Atolmis rubricollis* | 1 | 0 | 0 | 32 | 27 | 4 | 3 | 0 | 10.7 | Open | Pupa |
| Erebidae | *Callimorpha dominula* | 0 | 0 | 0 | 55 | 30 | 3 | 3 | 1 | 11.4 | Forest | Larva |
| Erebidae | *Calliteara abietis* | 0 | 0 | 0 | 46 | 13 | 5 | 2 | 1 | 11.4 | Forest | Larva |
| Erebidae | *Calliteara pudibunda* | 1 | 0 | 0 | 42.5 | 30 | 6 | 3 | 2 | 8.0 | Forest | Larva |
| Erebidae | *Calyptra thalictri* | 0 | NA | NA | 42.5 | 16 | 22 | 1 | 0 | 11.4 | Generalist | Larva |
| Erebidae | *Catocala adultera* | 0 | NA | NA | 76.5 | 6 | 7 | 2 | 0 | 9.4 | Forest | Egg |
| Erebidae | *Catocala electa* | 0 | NA | NA | 65 | 19 | 6 | 2 | 0 | 8.7 | Forest | Egg |
| Erebidae | *Catocala elocata* | 1 | NA | NA | 73.5 | 27 | 6 | 2 | 0 | 8.7 | Forest | Egg |
| Erebidae | *Catocala fraxini* | 0 | 0 | 1 | 87.5 | 29 | 4 | 3 | 1 | 7.3 | Generalist | Egg |
| Erebidae | *Catocala nupta* | 1 | 0 | 1 | 76.5 | 30 | 6 | 2 | 1 | 8.7 | Forest | Egg |
| Erebidae | *Catocala pacta* | 0 | 0 | 0 | 52.5 | 9 | 6 | 2 | 0 | 8.7 | Generalist | Egg |
| Erebidae | *Catocala promissa* | 0 | 0 | 0 | 60 | 30 | 4 | 2 | 0 | 11.8 | Forest | Egg |
| Erebidae | *Catocala sponsa* | 1 | 0 | 0 | 66 | 28 | 6 | 2 | 0 | 8.7 | Forest | Egg |
| Erebidae | *Colobochyla salicalis* | 0 | 0 | 0 | 26 | 25 | 4 | 2 | 0 | 11.8 | Generalist | Pupa |
| Erebidae | *Coscinia cribraria* | 0 | 0 | 0 | 37 | 29 | 4 | 3 | 1 | 11.4 | Forest | Larva |
| Erebidae | *Cybosia mesomella* | 0 | 0 | 0 | 31.5 | 28 | 6 | 3 | 1 | 10.8 | Open | Larva |
| Erebidae | *Diacrisia sannio* | 0 | 0 | 0 | 42.5 | 31 | 7 | 3 | 0 | 11.1 | Open | Larva |
| Erebidae | *Diaphora mendica* | 0 | 1 | 0 | 36.5 | 31 | 3 | 3 | 0 | 10.7 | Open | Pupa |
| Erebidae | *Dysauxes ancilla* | 0 | NA | NA | 26.5 | 21 | 3 | 3 | 0 | 11.7 | Open | Larva |
| Erebidae | *Eilema complana* | 1 | 1 | 0 | 33 | 30 | 9 | 3 | 0 | 11.8 | Generalist | Larva |
| Erebidae | *Eilema depressa* | 0 | 0 | 0 | 32 | 29 | 12 | 3 | 0 | 11.7 | Generalist | Larva |
| Erebidae | *Eilema griseola* | 0 | NA | NA | 30 | 25 | 7 | 3 | 0 | 11.7 | Forest | Larva |
| Erebidae | *Eilema lurideola* | 1 | 0 | 1 | 34.5 | 30 | 6 | 3 | 0 | 11.8 | Generalist | Larva |
| Erebidae | *Eilema lutarella* | 1 | 0 | 0 | 25.5 | 27 | 3 | 3 | 0 | 11.7 | Open | Larva |
| Erebidae | *Eilema pygmaeola* | 0 | 0 | 0 | 25 | 31 | 3 | 3 | 0 | 11.8 | Open | Larva |
| Erebidae | *Eilema sororcula* | 1 | 0 | 0 | 28.5 | 28 | 3 | 3 | 0 | 8.0 | Forest | Pupa |
| Erebidae | *Eublemma minutata* | 0 | 0 | 0 | 16 | 24 | 5 | 1 | 0 | 11.8 | Open | Pupa |
| Erebidae | *Euclidia glyphica* | 1 | 0 | 0 | 28.5 | 31 | 7 | 2 | 0 | 10.1 | Open | Pupa |
| Erebidae | *Euclidia mi* | 0 | 0 | 0 | 28.5 | 31 | 5 | 3 | 0 | 8.0 | Open | Pupa |
| Erebidae | *Euplagia quadripunctaria* | 0 | NA | NA | 59 | 27 | 10 | 3 | 1 | 11.4 | Generalist | Larva |
| Erebidae | *Euproctis chrysorrhoea* | 1 | NA | NA | 34 | 31 | 4 | 3 | 0 | 11.4 | Generalist | Larva |
| Erebidae | *Grammodes stolida* | 0 | NA | NA | 34 | 30 | 12 | 3 | 0 | 9.7 | Generalist | Egg |
| Erebidae | *Gynaephora fascelina* | 0 | 0 | 0 | 42.5 | 28 | 6 | 3 | 1 | 11.1 | Open | Larva |
| Erebidae | *Herminia grisealis* | 0 | 0 | 0 | 25 | 30 | 6 | 3 | 0 | 10.7 | Forest | Pupa |
| Erebidae | *Herminia tarsicrinalis* | 1 | NA | NA | 30 | 28 | 4 | 3 | 0 | 11.8 | Generalist | Larva |
| Erebidae | *Herminia tarsipennalis* | 1 | 0 | 1 | 29.5 | 27 | 7 | 3 | 1 | 11.4 | Generalist | Larva |
| Erebidae | *Hypena crassalis* | 0 | 0 | 0 | 29 | 28 | 6 | 2 | 2 | 10.7 | Generalist | Pupa |
| Erebidae | *Hypena lividalis* | 0 | NA | NA | 24.5 | 17 | 12 | 3 | 1 | 6.4 | Generalist | Imago |
| Erebidae | *Hypena proboscidalis* | 1 | 0 | 1 | 35 | 31 | 7 | 2 | 1 | 11.4 | Generalist | Larva |
| Erebidae | *Hypena rostralis* | 1 | 0 | 0 | 28 | 32 | 13 | 1 | 2 | 5.7 | Generalist | Imago |
| Erebidae | *Hypenodes humidalis* | 0 | 0 | 0 | 14.5 | 26 | 5 | 3 | 0 | 11.8 | Generalist | Larva |
| Erebidae | *Hyphantria cunea* | 0 | NA | NA | 36 | 18 | 12 | 3 | 0 | 10.7 | Open | Pupa |
| Erebidae | *Laelia coenosa* | 0 | NA | NA | 32.5 | 17 | 3 | 2 | 0 | 11.8 | Generalist | Larva |
| Erebidae | *Laspeyria flexula* | 0 | 0 | 1 | 26 | 27 | 6 | 3 | 0 | 11.7 | Generalist | Larva |
| Erebidae | *Leucoma salicis* | 0 | 0 | 1 | 46 | 32 | 7 | 3 | 0 | 11.8 | Forest | Larva |
| Erebidae | *Lithosia quadra* | 0 | NA | NA | 45 | 32 | 6 | 3 | 0 | 11.7 | Generalist | Larva |
| Erebidae | *Lygephila craccae* | 0 | 0 | 0 | 39.5 | 29 | 7 | 2 | 0 | 9.4 | Generalist | Egg |
| Erebidae | *Lygephila pastinum* | 0 | 0 | 0 | 38.5 | 27 | 7 | 2 | 0 | 11.4 | Generalist | Larva |
| Erebidae | *Lygephila viciae* | 0 | 0 | 0 | 37.5 | 26 | 6 | 2 | 1 | 10.7 | Forest | Pupa |
| Erebidae | *Lymantria dispar* | 1 | NA | NA | 50.5 | 31 | 4 | 2 | 0 | 8.7 | Generalist | Egg |
| Erebidae | *Lymantria monacha* | 1 | 0 | 1 | 45.5 | 30 | 4 | 2 | 2 | 9.9 | Generalist | Egg |
| Erebidae | *Macrochilo cribrumalis* | 0 | 0 | 0 | 24.5 | 25 | 5 | 3 | 0 | 11.2 | Generalist | Larva |
| Erebidae | *Miltochrista miniata* | 0 | 0 | 0 | 26 | 29 | 5 | 3 | 1 | 11.7 | Open | Larva |
| Erebidae | *Minucia lunaris* | 0 | NA | 0 | 55.5 | 26 | 6 | 2 | 0 | 7.5 | Forest | Pupa |
| Erebidae | *Nudaria mundana* | 0 | 0 | 0 | 21.5 | 26 | 5 | 3 | 0 | 11.8 | Generalist | Larva |
| Erebidae | *Orgyia antiqua* | 1 | 0 | 0 | 29.5 | 31 | 6 | 3 | 0 | 4.7 | Generalist | Egg |
| Erebidae | *Orgyia antiquoides* | 0 | 0 | 0 | 22 | 17 | 9 | 1 | 0 | 9.8 | Open | Egg |
| Erebidae | *Orgyia recens* | 0 | 0 | 0 | 29 | 24 | 2 | 3 | 0 | 11.4 | Generalist | Larva |
| Erebidae | *Paracolax tristalis* | 0 | 0 | 0 | 27 | 30 | 7 | 3 | 0 | 11.4 | Forest | Larva |
| Erebidae | *Parascotia fuliginaria* | 1 | 0 | 0 | 25 | 28 | 6 | 3 | 0 | 11.7 | Generalist | Larva |
| Erebidae | *Pechipogo strigilata* | 0 | 0 | 0 | 29 | 27 | 6 | 3 | 1 | 10.7 | Forest | Larva |
| Erebidae | *Pelosia muscerda* | 0 | 0 | 0 | 31.5 | 27 | 6 | 3 | 0 | 11.4 | Forest | Larva |
| Erebidae | *Pelosia obtusa* | 0 | 1 | 0 | 29 | 21 | 3 | 1 | 0 | 11.8 | Generalist | Larva |
| Erebidae | *Phragmatobia fuliginosa* | 1 | 1 | 1 | 33 | 36 | 3 | 3 | 0 | 9.5 | Generalist | Larva |
| Erebidae | *Phytometra viridaria* | 0 | 0 | 0 | 19 | 32 | 9 | 1 | 0 | 10.8 | Open | Pupa |
| Erebidae | *Polypogon tentacularia* | 0 | 0 | 0 | 26 | 27 | 8 | 3 | 0 | 11.1 | Generalist | Larva |
| Erebidae | *Rhyparia purpurata* | 0 | NA | NA | 46 | 27 | 6 | 3 | 0 | 9.8 | Open | Larva |
| Erebidae | *Rivula sericealis* | 1 | 1 | 1 | 21.5 | 34 | 11 | 3 | 1 | 9.8 | Generalist | Larva |
| Erebidae | *Schrankia costaestrigalis* | 0 | 0 | 0 | 19.5 | 32 | 5 | 3 | 1 | 11.8 | Generalist | Larva |
| Erebidae | *Schrankia taenialis* | 0 | 0 | 0 | 21 | 21 | 3 | 2 | 0 | 12.3 | Forest | Larva |
| Erebidae | *Scoliopteryx libatrix* | 1 | 1 | 1 | 42 | 32 | 18 | 3 | 0 | 6.4 | Generalist | Imago |
| Erebidae | *Setina irrorella* | 0 | 0 | 0 | 29 | 27 | 6 | 3 | 1 | 11.4 | Open | Larva |
| Erebidae | *Simplicia rectalis* | 0 | NA | NA | 29.5 | 15 | 8 | 1 | 0 | 9.3 | Generalist | Larva |
| Erebidae | *Sphrageidus similis* | 0 | 0 | 0 | 32.5 | 32 | 5 | 3 | 0 | 11.8 | Forest | Larva |
| Erebidae | *Spilarctia lutea* | 0 | 0 | 1 | 38 | 32 | 7 | 3 | 0 | 10.1 | Open | Pupa |
| Erebidae | *Spilosoma lubricipeda* | 0 | 1 | 0 | 41 | 33 | 3 | 3 | 2 | 10.0 | Open | Pupa |
| Erebidae | *Spilosoma urticae* | 0 | 0 | 0 | 42 | 26 | 8 | 3 | 0 | 10.8 | Generalist | Larva |
| Erebidae | *Spiris striata* | 0 | 0 | 0 | 26.5 | 28 | 5 | 1 | 1 | 11.2 | Open | Larva |
| Erebidae | *Thumatha senex* | 0 | 0 | 0 | 21 | 26 | 8 | 2 | 0 | 11.1 | Generalist | Larva |
| Erebidae | *Trisateles emortualis* | 1 | 0 | 0 | 26.5 | 24 | 8 | 2 | 0 | 11.1 | Forest | Pupa |
| Erebidae | *Tyria jacobaeae* | 0 | 0 | 0 | 40 | 33 | 3 | 1 | 0 | 9.6 | Open | Pupa |
| Erebidae | *Zanclognatha lunalis* | 0 | 0 | 0 | 28.5 | 25 | 6 | 3 | 1 | 11.7 | Generalist | Larva |
| Geometridae | *Abraxas grossulariata* | 0 | 1 | 0 | 32.5 | 30 | 6 | 2 | 2 | 11.7 | Generalist | Larva |
| Geometridae | *Abraxas sylvata* | 0 | 0 | 0 | 40.5 | 26 | 6 | 1 | 0 | 10.7 | Forest | Pupa |
| Geometridae | *Acasis viretata* | 0 | 0 | 1 | 23.5 | 27 | 4 | 2 | 1 | 8.5 | Forest | Pupa |
| Geometridae | *Aethalura punctulata* | 0 | 0 | 0 | 26.5 | 26 | 5 | 2 | 1 | 8.0 | Forest | Pupa |
| Geometridae | *Agriopis aurantiaria* | 0 | 0 | 1 | 37.5 | 28 | 3 | 3 | 0 | 3.0 | Forest | Egg |
| Geometridae | *Agriopis bajaria* | 1 | NA | NA | 30 | 21 | 8 | 3 | 2 | 3.0 | Generalist | Egg |
| Geometridae | *Agriopis leucophaearia* | 0 | 0 | 0 | 31 | 29 | 3 | 2 | 2 | 3.0 | Forest | Pupa |
| Geometridae | *Agriopis marginaria* | 0 | 0 | 1 | 34.5 | 30 | 3 | 3 | 1 | 3.0 | Generalist | Pupa |
| Geometridae | *Alcis bastelbergeri* | 1 | NA | NA | 41 | 15 | 8 | 2 | 1 | 11.4 | Generalist | Larva |
| Geometridae | *Alcis jubata* | 0 | 0 | 0 | 41 | 26 | 7 | 3 | 2 | 11.4 | Generalist | Larva |
| Geometridae | *Alcis repandata* | 0 | 0 | 1 | 37 | 31 | 7 | 3 | 2 | 11.4 | Generalist | Larva |
| Geometridae | *Alsophila aceraria* | 0 | NA | NA | 30 | 18 | 12 | 2 | 0 | 3.0 | Generalist | Egg |
| Geometridae | *Alsophila aescularia* | 0 | 0 | 0 | 32 | 28 | 3 | 3 | 0 | 3.0 | Forest | Pupa |
| Geometridae | *Angerona prunaria* | 0 | 0 | 0 | 46 | 27 | 4 | 3 | 2 | 11.8 | Generalist | Larva |
| Geometridae | *Anticlea derivata* | 0 | 0 | 0 | 26.5 | 27 | 6 | 1 | 0 | 7.5 | Forest | Pupa |
| Geometridae | *Anticollix sparsata* | 0 | 0 | 0 | 22 | 25 | 4 | 2 | 0 | 11.8 | Generalist | Pupa |
| Geometridae | *Apeira syringaria* | 0 | 0 | 0 | 38 | 28 | 4 | 2 | 0 | 11.8 | Forest | Larva |
| Geometridae | *Aplasta ononaria* | 1 | NA | NA | 25 | 24 | 8 | 2 | 1 | 11.1 | Open | Larva |
| Geometridae | *Aplocera efformata* | 0 | 0 | 1 | 30.5 | 29 | 12 | 2 | 0 | 9.7 | Open | Larva |
| Geometridae | *Aplocera plagiata* | 1 | 1 | 0 | 33.5 | 34 | 13 | 2 | 0 | 9.5 | Open | Larva |
| Geometridae | *Apocheima hispidaria* | 0 | 0 | 0 | 36.5 | 23 | 6 | 2 | 1 | 4.5 | Forest | Pupa |
| Geometridae | *Archiearis notha* | 0 | 0 | 0 | 33.5 | 25 | 6 | 2 | 1 | 4.5 | Forest | Pupa |
| Geometridae | *Archiearis parthenias* | 0 | 0 | 0 | 22 | 25 | 3 | 3 | 1 | 3.0 | Forest | Pupa |
| Geometridae | *Arichanna melanaria* | 0 | 1 | 0 | 37.5 | 15 | 7 | 2 | 1 | 11.4 | Generalist | Larva |
| Geometridae | *Ascotis selenaria* | 0 | NA | NA | 47 | 23 | 16 | 3 | 1 | 11.4 | Open | Pupa |
| Geometridae | *Aspitates gilvaria* | 0 | NA | NA | 30 | 26 | 16 | 3 | 1 | 10.7 | Open | Larva |
| Geometridae | *Asthena albulata* | 0 | 0 | 0 | 17.5 | 31 | 4 | 3 | 0 | 8.5 | Forest | Pupa |
| Geometridae | *Asthena anseraria* | 0 | NA | NA | 18 | 20 | 12 | 1 | 0 | 8.5 | Generalist | Pupa |
| Geometridae | *Biston betularia* | 1 | 1 | 1 | 51 | 29 | 10 | 3 | 2 | 10.4 | Generalist | Pupa |
| Geometridae | *Biston strataria* | 1 | 0 | 0 | 50 | 31 | 5 | 3 | 1 | 5.0 | Forest | Pupa |
| Geometridae | *Bupalus piniaria* | 1 | 1 | 0 | 35.5 | 30 | 10 | 2 | 2 | 10.4 | Forest | Pupa |
| Geometridae | *Cabera exanthemata* | 0 | 0 | 0 | 27.5 | 29 | 10 | 3 | 0 | 10.4 | Generalist | Pupa |
| Geometridae | *Cabera pusaria* | 0 | 1 | 1 | 30.5 | 31 | 10 | 3 | 0 | 10.4 | Generalist | Pupa |
| Geometridae | *Campaea margaritaria* | 1 | 0 | 1 | 29 | 32 | 4 | 3 | 0 | 11.8 | Generalist | Larva |
| Geometridae | *Camptogramma bilineata* | 1 | 0 | 1 | 25 | 34 | 8 | 2 | 0 | 11.1 | Open | Larva |
| Geometridae | *Carsia sororiata* | 0 | 0 | 0 | 21.5 | 17 | 7 | 2 | 2 | 11.4 | Generalist | Egg |
| Geometridae | *Catarhoe cuculata* | 1 | 1 | 0 | 25 | 26 | 4 | 2 | 0 | 11.8 | Open | Pupa |
| Geometridae | *Catarhoe rubidata* | 0 | 0 | 0 | 24.5 | 27 | 5 | 2 | 0 | 11.2 | Open | Pupa |
| Geometridae | *Cepphis advenaria* | 0 | 0 | 0 | 26.5 | 25 | 7 | 2 | 0 | 10.1 | Generalist | Pupa |
| Geometridae | *Charissa obscurata* | 0 | 0 | 0 | 28.5 | 31 | 6 | 3 | 0 | 11.7 | Generalist | Larva |
| Geometridae | *Chesias legatella* | 0 | 0 | 0 | 34 | 27 | 4 | 1 | 0 | 3.5 | Generalist | Egg |
| Geometridae | *Chesias rufata* | 0 | NA | NA | 28.5 | 25 | 13 | 1 | 0 | 9.2 | Open | Larva |
| Geometridae | *Chiasmia clathrata* | 1 | 1 | 1 | 25.5 | 32 | 11 | 3 | 2 | 10.0 | Open | Pupa |
| Geometridae | *Chlorissa viridata* | 0 | 0 | 0 | 20 | 31 | 7 | 2 | 0 | 10.1 | Open | Pupa |
| Geometridae | *Chloroclysta miata* | 0 | 0 | 1 | 31 | 29 | 15 | 3 | 0 | 5.5 | Generalist | Larva |
| Geometridae | *Chloroclysta siterata* | 1 | 0 | 1 | 27.5 | 31 | 13 | 3 | 1 | 5.0 | Generalist | Larva |
| Geometridae | *Chloroclystis v-ata* | 1 | 0 | 1 | 17.5 | 30 | 10 | 3 | 0 | 9.9 | Forest | Pupa |
| Geometridae | *Cidaria fulvata* | 0 | 0 | 1 | 24.5 | 29 | 4 | 2 | 0 | 11.8 | Open | Egg |
| Geometridae | *Cleora cinctaria* | 0 | 0 | 0 | 32.5 | 29 | 4 | 3 | 1 | 5.5 | Generalist | Pupa |
| Geometridae | *Cleorodes lichenaria* | 0 | 0 | 0 | 27 | 31 | 6 | 3 | 1 | 11.7 | Generalist | Larva |
| Geometridae | *Colostygia olivata* | 0 | 0 | 0 | 24.5 | 28 | 5 | 2 | 0 | 11.8 | Open | Larva |
| Geometridae | *Colostygia pectinataria* | 0 | 0 | 0 | 26 | 28 | 7 | 2 | 0 | 11.4 | Generalist | Larva |
| Geometridae | *Colotois pennaria* | 0 | 0 | 1 | 44.5 | 34 | 5 | 3 | 1 | 4.0 | Forest | Egg |
| Geometridae | *Comibaena bajularia* | 1 | 0 | 0 | 29.5 | 31 | 4 | 2 | 0 | 11.8 | Forest | Larva |
| Geometridae | *Cosmorhoe ocellata* | 0 | 0 | 1 | 24 | 32 | 11 | 2 | 0 | 9.1 | Generalist | Larva |
| Geometridae | *Costaconvexa polygrammata* | 1 | 0 | 0 | 21.5 | 30 | 10 | 2 | 0 | 9.2 | Open | Pupa |
| Geometridae | *Crocallis elinguaria* | 1 | 0 | 1 | 40 | 30 | 5 | 3 | 1 | 11.8 | Generalist | Larva |
| Geometridae | *Cyclophora albipunctata* | 1 | 0 | 0 | 22.5 | 25 | 8 | 2 | 0 | 10.1 | Generalist | Pupa |
| Geometridae | *Cyclophora annularia* | 1 | NA | NA | 23.5 | 27 | 4 | 1 | 0 | 10.5 | Generalist | Pupa |
| Geometridae | *Cyclophora linearia* | 1 | 0 | 0 | 25.5 | 28 | 7 | 1 | 1 | 10.1 | Forest | Pupa |
| Geometridae | *Cyclophora pendularia* | 0 | 0 | 0 | 23.5 | 25 | 6 | 2 | 0 | 10.7 | Forest | Pupa |
| Geometridae | *Cyclophora porata* | 0 | NA | 0 | 25 | 27 | 8 | 2 | 1 | 10.1 | Forest | Pupa |
| Geometridae | *Cyclophora punctaria* | 1 | 0 | 0 | 26.5 | 33 | 10 | 3 | 1 | 9.8 | Forest | Pupa |
| Geometridae | *Cyclophora quercimontaria* | 0 | 0 | 0 | 26 | 26 | 6 | 2 | 0 | 10.7 | Forest | Pupa |
| Geometridae | *Deileptenia ribeata* | 0 | 0 | 0 | 36.5 | 26 | 6 | 3 | 1 | 11.7 | Forest | Larva |
| Geometridae | *Dyscia fagaria* | 0 | 0 | 0 | 31 | 13 | 5 | 2 | 0 | 8.0 | Open | Pupa |
| Geometridae | *Dysstroma citrata* | 1 | 0 | 1 | 29.5 | 27 | 8 | 3 | 2 | 9.8 | Generalist | Egg |
| Geometridae | *Dysstroma latefasciata* | 0 | 0 | 0 | 30.5 | 7 | 7 | 2 | 2 | 9.4 | Generalist | Larva |
| Geometridae | *Dysstroma truncata* | 0 | 0 | 1 | 30 | 27 | 14 | 3 | 2 | 8.1 | Generalist | Larva |
| Geometridae | *Earophila badiata* | 1 | 0 | 0 | 29 | 25 | 5 | 1 | 1 | 5.0 | Open | Pupa |
| Geometridae | *Ecliptopera capitata* | 0 | 0 | 0 | 24.5 | 24 | 5 | 1 | 0 | 11.2 | Forest | Pupa |
| Geometridae | *Ecliptopera silaceata* | 0 | 0 | 0 | 27 | 27 | 11 | 2 | 0 | 9.5 | Generalist | Pupa |
| Geometridae | *Ectropis crepuscularia* | 1 | 0 | 0 | 33.5 | 29 | 12 | 3 | 2 | 9.0 | Generalist | Pupa |
| Geometridae | *Electrophaes corylata* | 0 | 0 | 0 | 27 | 26 | 7 | 3 | 1 | 10.1 | Forest | Pupa |
| Geometridae | *Elophos vittaria* | 0 | 0 | 0 | 30.5 | 15 | 5 | 3 | 0 | 11.2 | Open | Larva |
| Geometridae | *Ematurga atomaria* | 1 | 1 | 0 | 24.5 | 33 | 12 | 3 | 2 | 9.6 | Generalist | Pupa |
| Geometridae | *Ennomos alniaria* | 0 | 0 | 0 | 39.5 | 26 | 9 | 3 | 1 | 6.8 | Generalist | Egg |
| Geometridae | *Ennomos autumnaria* | 0 | 0 | 1 | 47.5 | 24 | 7 | 3 | 0 | 5.4 | Forest | Egg |
| Geometridae | *Ennomos erosaria* | 1 | 0 | 1 | 36 | 26 | 11 | 2 | 0 | 7.9 | Forest | Egg |
| Geometridae | *Ennomos fuscantaria* | 0 | 0 | 0 | 39.5 | 26 | 9 | 1 | 1 | 6.8 | Forest | Egg |
| Geometridae | *Ennomos quercinaria* | 0 | 0 | 0 | 41 | 29 | 7 | 2 | 1 | 9.4 | Forest | Egg |
| Geometridae | *Entephria caesiata* | 0 | 0 | 0 | 30.5 | 24 | 6 | 2 | 1 | 11.7 | Forest | Larva |
| Geometridae | *Epione repandaria* | 0 | 0 | 0 | 28 | 28 | 8 | 2 | 0 | 9.8 | Forest | Egg |
| Geometridae | *Epione vespertaria* | 0 | 0 | 0 | 27 | 24 | 6 | 3 | 0 | 11.2 | Forest | Egg |
| Geometridae | *Epirranthis diversata* | 0 | 0 | 0 | 38 | 17 | 9 | 3 | 1 | 6.0 | Forest | Pupa |
| Geometridae | *Epirrhoe alternata* | 1 | 1 | 1 | 24 | 31 | 8 | 2 | 1 | 9.3 | Generalist | Pupa |
| Geometridae | *Epirrhoe galiata* | 0 | 0 | 0 | 24.5 | 32 | 7 | 2 | 0 | 9.6 | Generalist | Pupa |
| Geometridae | *Epirrhoe hastulata* | 0 | NA | NA | 20.5 | 21 | 4 | 2 | 1 | 8.5 | Open | Pupa |
| Geometridae | *Epirrhoe rivata* | 0 | 0 | 0 | 26.5 | 29 | 7 | 2 | 0 | 11.4 | Open | Pupa |
| Geometridae | *Epirrhoe tristata* | 0 | 0 | 0 | 22.5 | 27 | 8 | 2 | 1 | 10.1 | Open | Pupa |
| Geometridae | *Epirrita autumnata* | 0 | 0 | 0 | 34.5 | 24 | 3 | 3 | 1 | 6.3 | Generalist | Egg |
| Geometridae | *Epirrita christyi* | 0 | 0 | 0 | 29 | 26 | 3 | 3 | 1 | 3.0 | Forest | Egg |
| Geometridae | *Epirrita dilutata* | 0 | 0 | 0 | 35 | 33 | 3 | 3 | 1 | 3.0 | Forest | Egg |
| Geometridae | *Erannis defoliaria* | 0 | 0 | 0 | 38 | 31 | 3 | 3 | 2 | 3.0 | Generalist | Egg |
| Geometridae | *Euchoeca nebulata* | 0 | 0 | 0 | 19.5 | 25 | 6 | 2 | 0 | 10.7 | Forest | Pupa |
| Geometridae | *Eulithis mellinata* | 1 | 0 | 0 | 29.5 | 22 | 8 | 2 | 1 | 11.1 | Forest | Egg |
| Geometridae | *Eulithis populata* | 0 | 0 | 0 | 29.5 | 28 | 10 | 3 | 2 | 9.9 | Generalist | Egg |
| Geometridae | *Eulithis prunata* | 1 | 0 | 0 | 34.5 | 28 | 8 | 2 | 1 | 9.8 | Generalist | Egg |
| Geometridae | *Eulithis testata* | 0 | 0 | 0 | 30 | 24 | 7 | 3 | 1 | 9.4 | Generalist | Egg |
| Geometridae | *Euphyia biangulata* | 0 | 0 | 0 | 29 | 26 | 7 | 2 | 0 | 11.4 | Forest | Pupa |
| Geometridae | *Euphyia unangulata* | 0 | 0 | 0 | 24.5 | 27 | 10 | 2 | 0 | 10.4 | Forest | Pupa |
| Geometridae | *Eupithecia abbreviata* | 0 | 0 | 1 | 21 | 25 | 7 | 2 | 1 | 7.0 | Forest | Pupa |
| Geometridae | *Eupithecia abietaria* | 1 | 0 | 0 | 21.5 | 25 | 6 | 2 | 1 | 10.7 | Forest | Pupa |
| Geometridae | *Eupithecia absinthiata* | 0 | 0 | 1 | 20.5 | 28 | 7 | 3 | 1 | 11.4 | Generalist | Pupa |
| Geometridae | *Eupithecia actaeata* | 0 | 0 | 0 | 21.5 | 21 | 8 | 1 | 1 | 10.1 | Forest | Pupa |
| Geometridae | *Eupithecia analoga* | 0 | 0 | 0 | 19 | 21 | 4 | 2 | 0 | 8.5 | Forest | Pupa |
| Geometridae | *Eupithecia assimilata* | 0 | 0 | 0 | 19 | 27 | 9 | 1 | 0 | 9.7 | Generalist | Pupa |
| Geometridae | *Eupithecia centaureata* | 1 | 1 | 1 | 20.5 | 35 | 13 | 2 | 0 | 9.5 | Open | Pupa |
| Geometridae | *Eupithecia conterminata* | 0 | 0 | 0 | 17 | 15 | 5 | 2 | 0 | 8.0 | Forest | Pupa |
| Geometridae | *Eupithecia denotata* | 0 | 0 | 0 | 20.5 | 28 | 6 | 2 | 1 | 11.7 | Open | Pupa |
| Geometridae | *Eupithecia distinctaria* | 0 | NA | NA | 17 | 22 | 8 | 2 | 1 | 11.7 | Open | Pupa |
| Geometridae | *Eupithecia dodoneata* | 1 | 0 | 1 | 17.5 | 32 | 6 | 2 | 1 | 7.5 | Forest | Pupa |
| Geometridae | *Eupithecia egenaria* | 0 | 0 | 0 | 21.5 | 23 | 3 | 1 | 0 | 9.0 | Forest | Pupa |
| Geometridae | *Eupithecia exiguata* | 0 | 0 | 1 | 19.5 | 24 | 5 | 2 | 0 | 8.0 | Generalist | Pupa |
| Geometridae | *Eupithecia goossensiata* | 0 | 0 | 0 | 20.5 | 21 | 4 | 2 | 0 | 11.4 | Generalist | Pupa |
| Geometridae | *Eupithecia haworthiata* | 0 | 0 | 0 | 15.5 | 25 | 6 | 1 | 0 | 11.7 | Open | Pupa |
| Geometridae | *Eupithecia icterata* | 0 | 0 | 0 | 20 | 29 | 8 | 3 | 2 | 9.8 | Open | Pupa |
| Geometridae | *Eupithecia immundata* | 0 | NA | 0 | 18.5 | 20 | 3 | 1 | 0 | 9.0 | Forest | Pupa |
| Geometridae | *Eupithecia indigata* | 0 | 0 | 0 | 17.5 | 26 | 5 | 2 | 0 | 8.0 | Forest | Pupa |
| Geometridae | *Eupithecia innotata* | 1 | 0 | 1 | 21 | 31 | 12 | 2 | 1 | 8.8 | Open | Pupa |
| Geometridae | *Eupithecia insigniata* | 0 | 0 | 0 | 19 | 23 | 5 | 2 | 0 | 8.0 | Forest | Pupa |
| Geometridae | *Eupithecia intricata* | 1 | 0 | 0 | 21 | 26 | 4 | 2 | 1 | 8.5 | Generalist | Pupa |
| Geometridae | *Eupithecia inturbata* | 0 | 1 | 1 | 15.5 | 21 | 4 | 1 | 0 | 11.8 | Forest | Egg |
| Geometridae | *Eupithecia irriguata* | 0 | 0 | 0 | 19 | 27 | 7 | 2 | 0 | 7.0 | Forest | Pupa |
| Geometridae | *Eupithecia lanceata* | 0 | 0 | 0 | 19 | 21 | 5 | 2 | 0 | 5.0 | Forest | Pupa |
| Geometridae | *Eupithecia lariciata* | 0 | 0 | 0 | 20 | 26 | 5 | 2 | 1 | 11.2 | Forest | Pupa |
| Geometridae | *Eupithecia linariata* | 1 | 0 | 0 | 17 | 28 | 10 | 1 | 0 | 9.9 | Open | Pupa |
| Geometridae | *Eupithecia millefoliata* | 0 | 0 | 0 | 21.5 | 26 | 7 | 2 | 1 | 11.4 | Open | Pupa |
| Geometridae | *Eupithecia nanata* | 0 | 0 | 0 | 18.5 | 28 | 11 | 2 | 1 | 10.0 | Open | Pupa |
| Geometridae | *Eupithecia ochridata* | 0 | 0 | 0 | 21 | 14 | 4 | 2 | 1 | 8.8 | Generalist | Pupa |
| Geometridae | *Eupithecia pimpinellata* | 0 | 0 | 0 | 21.5 | 29 | 6 | 2 | 1 | 11.7 | Open | Pupa |
| Geometridae | *Eupithecia plumbeolata* | 0 | 0 | 0 | 16 | 28 | 7 | 2 | 0 | 10.1 | Forest | Pupa |
| Geometridae | *Eupithecia pusillata* | 1 | 0 | 1 | 18.5 | 29 | 8 | 2 | 1 | 9.8 | Generalist | Egg |
| Geometridae | *Eupithecia pygmaeata* | 0 | 0 | 0 | 17 | 21 | 4 | 2 | 1 | 8.5 | Open | Pupa |
| Geometridae | *Eupithecia satyrata* | 1 | 0 | 1 | 18.5 | 30 | 7 | 3 | 1 | 10.1 | Generalist | Pupa |
| Geometridae | *Eupithecia selinata* | 0 | NA | NA | 20.5 | 21 | 4 | 2 | 0 | 11.8 | Generalist | Pupa |
| Geometridae | *Eupithecia simpliciata* | 0 | 1 | 0 | 22 | 24 | 7 | 2 | 1 | 11.4 | Generalist | Pupa |
| Geometridae | *Eupithecia sinuosaria* | 0 | 0 | 0 | 20.5 | 19 | 7 | 2 | 0 | 11.4 | Generalist | Pupa |
| Geometridae | *Eupithecia subfuscata* | 1 | 0 | 1 | 20 | 29 | 7 | 3 | 1 | 10.1 | Generalist | Pupa |
| Geometridae | *Eupithecia subumbrata* | 0 | 0 | 0 | 19 | 28 | 6 | 3 | 1 | 10.7 | Open | Pupa |
| Geometridae | *Eupithecia succenturiata* | 0 | 0 | 1 | 22.5 | 28 | 12 | 3 | 1 | 9.7 | Open | Pupa |
| Geometridae | *Eupithecia tantillaria* | 0 | 1 | 0 | 18 | 27 | 5 | 3 | 0 | 8.0 | Forest | Pupa |
| Geometridae | *Eupithecia tenuiata* | 1 | 0 | 1 | 15.5 | 25 | 6 | 2 | 1 | 11.7 | Forest | Egg |
| Geometridae | *Eupithecia tripunctaria* | 0 | 0 | 0 | 20 | 27 | 11 | 2 | 1 | 9.1 | Open | Pupa |
| Geometridae | *Eupithecia trisignaria* | 0 | 0 | 0 | 18 | 26 | 9 | 2 | 1 | 10.8 | Open | Pupa |
| Geometridae | *Eupithecia valerianata* | 0 | 0 | 0 | 17 | 22 | 6 | 2 | 0 | 10.7 | Open | Pupa |
| Geometridae | *Eupithecia venosata* | 0 | 0 | 0 | 22.5 | 33 | 5 | 2 | 0 | 11.2 | Open | Pupa |
| Geometridae | *Eupithecia virgaureata* | 0 | 0 | 0 | 19 | 28 | 4 | 3 | 1 | 8.5 | Generalist | Pupa |
| Geometridae | *Eupithecia vulgata* | 1 | 0 | 1 | 18 | 29 | 8 | 3 | 1 | 9.6 | Generalist | Pupa |
| Geometridae | *Eustroma reticulata* | 0 | 0 | 0 | 25 | 23 | 7 | 1 | 0 | 11.4 | Forest | Pupa |
| Geometridae | *Fagivorina arenaria* | 0 | 0 | 0 | 31 | 23 | 5 | 2 | 0 | 11.2 | Forest | Pupa |
| Geometridae | *Gagitodes sagittata* | 0 | 0 | 0 | 25.5 | 22 | 5 | 1 | 0 | 11.2 | Forest | Pupa |
| Geometridae | *Gandaritis pyraliata* | 0 | 0 | 0 | 31 | 28 | 7 | 2 | 1 | 11.4 | Forest | Egg |
| Geometridae | *Geometra papilionaria* | 0 | 0 | 1 | 47 | 28 | 7 | 3 | 0 | 11.4 | Generalist | Larva |
| Geometridae | *Gnophos obfuscata* | 0 | 0 | 0 | 40 | 22 | 7 | 3 | 0 | 11.4 | Generalist | Larva |
| Geometridae | *Gymnoscelis rufifasciata* | 1 | 0 | 1 | 17 | 35 | 15 | 3 | 1 | 8.9 | Generalist | Pupa |
| Geometridae | *Hemistola chrysoprasaria* | 0 | 0 | 0 | 31 | 29 | 6 | 1 | 0 | 11.7 | Open | Larva |
| Geometridae | *Hemithea aestivaria* | 0 | 0 | 1 | 28.5 | 31 | 7 | 3 | 0 | 11.4 | Forest | Larva |
| Geometridae | *Heterothera serraria* | 0 | 0 | 0 | 27.5 | 7 | 5 | 2 | 0 | 11.2 | Forest | Larva |
| Geometridae | *Horisme aquata* | 0 | NA | 0 | 23.5 | 17 | 4 | 1 | 0 | 8.5 | Open | Larva |
| Geometridae | *Horisme corticata* | 0 | NA | NA | 27 | 16 | 16 | 2 | 1 | 10.7 | Generalist | Pupa |
| Geometridae | *Horisme tersata* | 0 | 0 | 0 | 30 | 32 | 7 | 3 | 0 | 10.1 | Forest | Pupa |
| Geometridae | *Horisme vitalbata* | 1 | NA | NA | 29 | 30 | 6 | 3 | 0 | 10.7 | Open | Pupa |
| Geometridae | *Hydrelia flammeolaria* | 0 | 0 | 1 | 18 | 26 | 6 | 2 | 0 | 10.7 | Forest | Pupa |
| Geometridae | *Hydrelia sylvata* | 0 | 0 | 0 | 21 | 24 | 5 | 2 | 0 | 11.2 | Forest | Pupa |
| Geometridae | *Hydriomena furcata* | 0 | 1 | 0 | 29.5 | 28 | 7 | 3 | 2 | 10.1 | Generalist | Egg |
| Geometridae | *Hydriomena impluviata* | 0 | 0 | 0 | 29 | 28 | 7 | 3 | 2 | 10.1 | Generalist | Pupa |
| Geometridae | *Hydriomena ruberata* | 0 | 0 | 0 | 30 | 23 | 5 | 2 | 2 | 8.0 | Generalist | Pupa |
| Geometridae | *Hylaea fasciaria* | 0 | 0 | 0 | 33.5 | 27 | 7 | 2 | 2 | 11.4 | Forest | Larva |
| Geometridae | *Hypomecis punctinalis* | 0 | 0 | 0 | 44.5 | 29 | 7 | 3 | 1 | 10.1 | Forest | Pupa |
| Geometridae | *Hypomecis roboraria* | 1 | 0 | 0 | 52.5 | 28 | 4 | 3 | 1 | 11.8 | Forest | Larva |
| Geometridae | *Idaea aversata* | 1 | 1 | 1 | 28.5 | 33 | 8 | 2 | 1 | 11.1 | Generalist | Larva |
| Geometridae | *Idaea biselata* | 1 | 0 | 0 | 20 | 28 | 6 | 2 | 1 | 11.7 | Generalist | Larva |
| Geometridae | *Idaea deversaria* | 1 | 1 | 0 | 26 | 29 | 4 | 2 | 0 | 11.8 | Open | Larva |
| Geometridae | *Idaea dilutaria* | 0 | NA | NA | 16.5 | 23 | 3 | 2 | 0 | 12.3 | Generalist | Larva |
| Geometridae | *Idaea dimidiata* | 0 | 0 | 0 | 18 | 33 | 7 | 2 | 0 | 11.4 | Generalist | Larva |
| Geometridae | *Idaea emarginata* | 0 | 0 | 0 | 21.5 | 29 | 6 | 3 | 1 | 11.7 | Forest | Larva |
| Geometridae | *Idaea fuscovenosa* | 1 | 1 | 0 | 18 | 28 | 4 | 2 | 0 | 11.8 | Open | Larva |
| Geometridae | *Idaea humiliata* | 0 | 0 | 0 | 15.5 | 31 | 5 | 2 | 0 | 11.2 | Open | Larva |
| Geometridae | *Idaea muricata* | 0 | 0 | 0 | 16.5 | 26 | 4 | 3 | 1 | 11.2 | Generalist | Larva |
| Geometridae | *Idaea ochrata* | 0 | NA | 0 | 21 | 28 | 3 | 3 | 0 | 11.7 | Open | Larva |
| Geometridae | *Idaea pallidata* | 0 | 0 | 0 | 18 | 26 | 5 | 2 | 0 | 8.3 | Open | Larva |
| Geometridae | *Idaea seriata* | 1 | 1 | 1 | 18.5 | 32 | 13 | 2 | 1 | 8.3 | Generalist | Larva |
| Geometridae | *Idaea serpentata* | 0 | 0 | 0 | 19 | 28 | 4 | 2 | 0 | 11.2 | Open | Larva |
| Geometridae | *Idaea straminata* | 1 | 1 | 0 | 26 | 32 | 6 | 3 | 0 | 11.7 | Forest | Larva |
| Geometridae | *Idaea sylvestraria* | 0 | 0 | 0 | 17 | 25 | 6 | 2 | 0 | 11.7 | Open | Larva |
| Geometridae | *Jodis lactearia* | 0 | 0 | 0 | 23 | 29 | 3 | 3 | 0 | 9.0 | Generalist | Pupa |
| Geometridae | *Jodis putata* | 0 | 0 | 0 | 20.5 | 21 | 4 | 2 | 0 | 8.5 | Generalist | Pupa |
| Geometridae | *Lampropteryx otregiata* | 0 | 0 | 0 | 24 | 14 | 6 | 1 | 0 | 10.7 | Forest | Pupa |
| Geometridae | *Lampropteryx suffumata* | 0 | 0 | 0 | 29 | 27 | 7 | 2 | 0 | 7.0 | Open | Pupa |
| Geometridae | *Larentia clavaria* | 0 | 0 | 0 | 35.5 | 33 | 3 | 2 | 1 | 6.3 | Open | Egg |
| Geometridae | *Ligdia adustata* | 1 | 0 | 0 | 24.5 | 29 | 11 | 1 | 0 | 10.0 | Forest | Pupa |
| Geometridae | *Lithostege farinata* | 0 | NA | NA | 31 | 19 | 7 | 2 | 0 | 10.1 | Open | Pupa |
| Geometridae | *Lithostege griseata* | 0 | 0 | 0 | 26 | 21 | 5 | 2 | 0 | 8.0 | Open | Pupa |
| Geometridae | *Lobophora halterata* | 0 | 1 | 0 | 24.5 | 26 | 5 | 3 | 1 | 8.0 | Forest | Pupa |
| Geometridae | *Lomaspilis marginata* | 1 | 1 | 1 | 23.5 | 30 | 10 | 3 | 2 | 10.4 | Generalist | Pupa |
| Geometridae | *Lomographa bimaculata* | 1 | 0 | 1 | 25 | 27 | 8 | 3 | 0 | 9.6 | Forest | Pupa |
| Geometridae | *Lomographa temerata* | 1 | 0 | 1 | 27 | 27 | 7 | 3 | 1 | 10.1 | Forest | Pupa |
| Geometridae | *Lycia hirtaria* | 0 | 0 | 0 | 44 | 31 | 9 | 3 | 1 | 6.0 | Forest | Pupa |
| Geometridae | *Lycia zonaria* | 0 | NA | 0 | 27 | 18 | 5 | 2 | 0 | 5.0 | Open | Pupa |
| Geometridae | *Lythria cruentaria* | 0 | 0 | 0 | 22 | 22 | 8 | 2 | 2 | 9.6 | Open | Pupa |
| Geometridae | *Lythria purpuraria* | 0 | NA | NA | 23.5 | 21 | 16 | 2 | 0 | 9.6 | Open | Pupa |
| Geometridae | *Macaria alternata* | 1 | 0 | 1 | 27 | 27 | 6 | 3 | 0 | 10.7 | Forest | Pupa |
| Geometridae | *Macaria brunneata* | 0 | 0 | 0 | 24.5 | 22 | 8 | 3 | 0 | 11.1 | Generalist | Egg |
| Geometridae | *Macaria carbonaria* | 0 | 0 | 0 | 21 | 15 | 6 | 2 | 0 | 7.5 | Generalist | Pupa |
| Geometridae | *Macaria liturata* | 1 | 1 | 0 | 28.5 | 28 | 10 | 2 | 0 | 10.4 | Forest | Pupa |
| Geometridae | *Macaria notata* | 1 | 0 | 0 | 27 | 27 | 7 | 3 | 0 | 10.1 | Forest | Pupa |
| Geometridae | *Macaria signaria* | 0 | 0 | 0 | 27 | 23 | 6 | 2 | 1 | 10.7 | Forest | Pupa |
| Geometridae | *Macaria wauaria* | 0 | 0 | 1 | 27 | 26 | 7 | 2 | 0 | 11.4 | Forest | Egg |
| Geometridae | *Malacodea regelaria* | 0 | 0 | 0 | 28 | 5 | 6 | 2 | 0 | 4.5 | Forest | Pupa |
| Geometridae | *Martania taeniata* | 0 | 0 | 0 | 21.5 | 20 | 6 | 3 | 1 | 11.7 | Generalist | Larva |
| Geometridae | *Melanthia procellata* | 0 | NA | 0 | 30 | 23 | 10 | 1 | 0 | 11.8 | Generalist | Egg |
| Geometridae | *Mesoleuca albicillata* | 0 | 0 | 0 | 30.5 | 26 | 6 | 2 | 0 | 10.7 | Generalist | Pupa |
| Geometridae | *Mesotype didymata* | 0 | 0 | 0 | 23 | 26 | 7 | 3 | 1 | 11.4 | Generalist | Egg |
| Geometridae | *Mesotype parallelolineata* | 0 | 0 | 0 | 24.5 | 22 | 4 | 2 | 0 | 7.3 | Open | Egg |
| Geometridae | *Minoa murinata* | 1 | NA | NA | 18 | 23 | 14 | 1 | 1 | 9.6 | Open | Pupa |
| Geometridae | *Narraga fasciolaria* | 0 | NA | NA | 18.5 | 14 | 16 | 1 | 1 | 11.4 | Open | Pupa |
| Geometridae | *Nothocasis sertata* | 0 | NA | 0 | 28 | 17 | 6 | 1 | 0 | 4.7 | Forest | Egg |
| Geometridae | *Odezia atrata* | 0 | 0 | 0 | 24 | 29 | 6 | 3 | 0 | 10.7 | Open | Egg |
| Geometridae | *Odontopera bidentata* | 0 | 0 | 0 | 42 | 27 | 5 | 3 | 2 | 8.0 | Generalist | Pupa |
| Geometridae | *Operophtera brumata* | 1 | 1 | 0 | 27.5 | 30 | 4 | 3 | 0 | 2.0 | Generalist | Egg |
| Geometridae | *Operophtera fagata* | 0 | 1 | 0 | 27.5 | 25 | 4 | 3 | 0 | 2.0 | Forest | Egg |
| Geometridae | *Opisthograptis luteolata* | 1 | 0 | 1 | 35 | 33 | 8 | 3 | 0 | 9.6 | Generalist | Pupa |
| Geometridae | *Orthonama obstipata* | 0 | NA | NA | 20 | 35 | 11 | 2 | 2 | 7.7 | Generalist | Imago |
| Geometridae | *Orthonama vittata* | 1 | 0 | 0 | 21.5 | 23 | 11 | 2 | 1 | 9.1 | Generalist | Larva |
| Geometridae | *Ourapteryx sambucaria* | 0 | 0 | 1 | 49 | 30 | 7 | 3 | 0 | 11.4 | Generalist | Larva |
| Geometridae | *Pachycnemia hippocastanaria* | 0 | NA | NA | 28.5 | 27 | 13 | 2 | 0 | 8.5 | Open | Pupa |
| Geometridae | *Paradarisa consonaria* | 0 | 0 | 0 | 35 | 26 | 5 | 3 | 2 | 8.0 | Forest | Pupa |
| Geometridae | *Parectropis similaria* | 0 | 0 | 0 | 31 | 21 | 6 | 2 | 1 | 10.7 | Forest | Pupa |
| Geometridae | *Pareulype berberata* | 0 | NA | NA | 29 | 21 | 12 | 1 | 0 | 10.7 | Generalist | Pupa |
| Geometridae | *Pasiphila chloerata* | 1 | 0 | 1 | 17 | 24 | 5 | 2 | 1 | 11.2 | Forest | Egg |
| Geometridae | *Pasiphila debiliata* | 0 | 0 | 0 | 19 | 26 | 6 | 2 | 0 | 11.7 | Generalist | Egg |
| Geometridae | *Pasiphila rectangulata* | 1 | 0 | 1 | 18.5 | 32 | 5 | 3 | 2 | 11.2 | Forest | Egg |
| Geometridae | *Pelurga comitata* | 0 | 1 | 0 | 31 | 26 | 7 | 3 | 0 | 11.4 | Generalist | Pupa |
| Geometridae | *Pennithera firmata* | 1 | 0 | 0 | 28.5 | 28 | 6 | 2 | 0 | 4.7 | Forest | Egg |
| Geometridae | *Perconia strigillaria* | 0 | 0 | 0 | 32.5 | 29 | 7 | 2 | 0 | 10.1 | Open | Larva |
| Geometridae | *Peribatodes rhomboidaria* | 1 | 0 | 1 | 37.5 | 30 | 6 | 3 | 1 | 11.7 | Generalist | Larva |
| Geometridae | *Peribatodes secundaria* | 1 | 0 | 1 | 35.5 | 25 | 5 | 3 | 1 | 11.8 | Forest | Larva |
| Geometridae | *Perizoma affinitata* | 0 | 0 | 0 | 24.5 | 26 | 7 | 1 | 0 | 10.1 | Generalist | Pupa |
| Geometridae | *Perizoma albulata* | 0 | 0 | 0 | 19 | 29 | 10 | 1 | 1 | 10.4 | Open | Pupa |
| Geometridae | *Perizoma alchemillata* | 1 | 1 | 1 | 18.5 | 31 | 7 | 2 | 0 | 11.4 | Generalist | Pupa |
| Geometridae | *Perizoma bifaciata* | 0 | 0 | 0 | 19.5 | 31 | 5 | 1 | 0 | 11.8 | Open | Pupa |
| Geometridae | *Perizoma blandiata* | 0 | 0 | 0 | 18 | 27 | 4 | 1 | 1 | 11.8 | Open | Pupa |
| Geometridae | *Perizoma flavofasciata* | 0 | 0 | 0 | 23.5 | 29 | 7 | 1 | 0 | 10.1 | Forest | Pupa |
| Geometridae | *Perizoma hydrata* | 0 | 0 | 0 | 19.5 | 24 | 6 | 1 | 0 | 10.7 | Open | Pupa |
| Geometridae | *Petrophora chlorosata* | 0 | 0 | 0 | 29 | 31 | 4 | 2 | 0 | 8.5 | Generalist | Pupa |
| Geometridae | *Phibalapteryx virgata* | 0 | 0 | 0 | 20 | 26 | 12 | 2 | 1 | 9.6 | Open | Pupa |
| Geometridae | *Phigalia pilosaria* | 0 | 0 | 1 | 43.5 | 30 | 3 | 3 | 1 | 3.0 | Generalist | Pupa |
| Geometridae | *Philereme transversata* | 1 | 1 | 1 | 32.5 | 27 | 6 | 3 | 0 | 11.7 | Open | Egg |
| Geometridae | *Philereme vetulata* | 1 | 0 | 0 | 26.5 | 26 | 6 | 2 | 0 | 11.7 | Open | Egg |
| Geometridae | *Plagodis dolabraria* | 0 | 0 | 0 | 33.5 | 29 | 7 | 3 | 0 | 10.1 | Forest | Pupa |
| Geometridae | *Plagodis pulveraria* | 0 | 0 | 0 | 33 | 25 | 5 | 3 | 1 | 8.0 | Generalist | Pupa |
| Geometridae | *Plemyria rubiginata* | 0 | 0 | 1 | 24 | 28 | 5 | 3 | 0 | 11.8 | Forest | Egg |
| Geometridae | *Pseudopanthera macularia* | 0 | 0 | 0 | 27 | 30 | 5 | 3 | 0 | 8.0 | Generalist | Pupa |
| Geometridae | *Pseudoterpna pruinata* | 0 | NA | NA | 29.5 | 26 | 7 | 1 | 0 | 11.4 | Open | Larva |
| Geometridae | *Pterapherapteryx sexalata* | 0 | 1 | 0 | 20.5 | 25 | 6 | 3 | 0 | 10.7 | Generalist | Pupa |
| Geometridae | *Rheumaptera cervinalis* | 0 | 0 | 0 | 36 | 24 | 6 | 1 | 0 | 7.5 | Generalist | Pupa |
| Geometridae | *Rheumaptera hastata* | 0 | 0 | 0 | 29.5 | 26 | 5 | 3 | 1 | 8.0 | Open | Pupa |
| Geometridae | *Rheumaptera subhastata* | 0 | NA | NA | 24.5 | 19 | 5 | 3 | 1 | 11.2 | Generalist | Pupa |
| Geometridae | *Rheumaptera undulata* | 0 | 0 | 0 | 30 | 26 | 7 | 3 | 0 | 11.4 | Generalist | Pupa |
| Geometridae | *Rhodometra sacraria* | 0 | NA | NA | 24 | 32 | 6 | 3 | 1 | 4.7 | Generalist | Larva |
| Geometridae | *Rhodostrophia vibicaria* | 0 | 0 | 0 | 27 | 28 | 8 | 3 | 2 | 11.1 | Open | Larva |
| Geometridae | *Scopula decorata* | 0 | 0 | 0 | 23.5 | 29 | 7 | 1 | 0 | 11.4 | Open | Larva |
| Geometridae | *Scopula floslactata* | 0 | 0 | 0 | 26 | 26 | 4 | 3 | 1 | 8.5 | Forest | Larva |
| Geometridae | *Scopula immorata* | 0 | 0 | 0 | 23.5 | 27 | 6 | 2 | 0 | 10.7 | Open | Larva |
| Geometridae | *Scopula immutata* | 0 | 0 | 0 | 23 | 30 | 7 | 3 | 0 | 11.4 | Open | Larva |
| Geometridae | *Scopula incanata* | 0 | 0 | 0 | 26.5 | 28 | 6 | 3 | 1 | 11.7 | Open | Larva |
| Geometridae | *Scopula marginepunctata* | 0 | NA | NA | 24 | 32 | 6 | 2 | 1 | 10.0 | Open | Larva |
| Geometridae | *Scopula nigropunctata* | 0 | NA | NA | 27 | 28 | 5 | 2 | 0 | 11.8 | Generalist | Larva |
| Geometridae | *Scopula ornata* | 0 | 0 | 0 | 22.5 | 33 | 12 | 2 | 0 | 9.3 | Open | Larva |
| Geometridae | *Scopula rubiginata* | 1 | 0 | 0 | 19 | 29 | 10 | 1 | 1 | 10.4 | Open | Larva |
| Geometridae | *Scopula ternata* | 0 | 0 | 0 | 25 | 23 | 6 | 3 | 0 | 10.7 | Open | Larva |
| Geometridae | *Scopula virgulata* | 0 | NA | NA | 21 | 20 | 6 | 1 | 0 | 10.7 | Open | Larva |
| Geometridae | *Scotopteryx chenopodiata* | 0 | 0 | 0 | 31 | 30 | 6 | 2 | 1 | 11.7 | Generalist | Larva |
| Geometridae | *Scotopteryx luridata* | 0 | 0 | 0 | 29 | 22 | 7 | 1 | 1 | 11.4 | Open | Larva |
| Geometridae | *Scotopteryx moeniata* | 0 | NA | NA | 30 | 20 | 8 | 2 | 1 | 11.7 | Generalist | Larva |
| Geometridae | *Scotopteryx mucronata* | 0 | NA | NA | 28 | 23 | 4 | 1 | 1 | 8.5 | Open | Pupa |
| Geometridae | *Selenia dentaria* | 0 | 0 | 0 | 39 | 28 | 12 | 3 | 1 | 9.0 | Generalist | Pupa |
| Geometridae | *Selenia lunularia* | 0 | 0 | 0 | 35 | 31 | 7 | 3 | 1 | 10.1 | Forest | Pupa |
| Geometridae | *Selenia tetralunaria* | 0 | 1 | 0 | 39.5 | 25 | 11 | 3 | 1 | 8.7 | Forest | Pupa |
| Geometridae | *Selidosema brunnearia* | 0 | 0 | 0 | 32.5 | 21 | 5 | 2 | 1 | 11.8 | Open | Larva |
| Geometridae | *Siona lineata* | 0 | 0 | 0 | 38 | 29 | 7 | 3 | 0 | 10.1 | Open | Larva |
| Geometridae | *Spargania luctuata* | 0 | 0 | 0 | 26.5 | 25 | 11 | 2 | 1 | 8.4 | Generalist | Pupa |
| Geometridae | *Stegania trimaculata* | 1 | NA | NA | 27 | 13 | 12 | 1 | 2 | 10.0 | Generalist | Pupa |
| Geometridae | *Thalera fimbrialis* | 0 | 0 | 0 | 27 | 31 | 7 | 2 | 0 | 11.4 | Generalist | Larva |
| Geometridae | *Thera britannica* | 1 | NA | 0 | 28 | 19 | 11 | 1 | 2 | 6.2 | Generalist | Egg |
| Geometridae | *Thera cognata* | 1 | 0 | 0 | 23 | 25 | 6 | 2 | 1 | 11.7 | Open | Egg |
| Geometridae | *Thera juniperata* | 0 | 0 | 0 | 25 | 27 | 4 | 2 | 1 | 3.5 | Open | Egg |
| Geometridae | *Thera obeliscata* | 1 | 0 | 0 | 26.5 | 27 | 16 | 2 | 2 | 7.9 | Forest | Larva |
| Geometridae | *Thera variata* | 1 | 0 | 0 | 26.5 | 27 | 5 | 2 | 2 | 11.2 | Forest | Larva |
| Geometridae | *Theria rupicapraria* | 1 | 0 | 0 | 29 | 18 | 3 | 2 | 0 | 3.0 | Open | Pupa |
| Geometridae | *Timandra comae* | 1 | 1 | 1 | 29 | 33 | 10 | 3 | 0 | 9.2 | Generalist | Larva |
| Geometridae | *Timandra griseata* | 0 | NA | NA | 29 | 5 | 14 | 3 | 0 | 9.2 | Generalist | Larva |
| Geometridae | *Trichopteryx carpinata* | 0 | 0 | 1 | 28.5 | 27 | 5 | 3 | 0 | 5.0 | Generalist | Pupa |
| Geometridae | *Triphosa dubitata* | 0 | 0 | 0 | 38 | 29 | 14 | 3 | 0 | 6.2 | Open | Larva |
| Geometridae | *Venusia blomeri* | 0 | 0 | 0 | 21 | 19 | 5 | 1 | 0 | 11.2 | Forest | Pupa |
| Geometridae | *Venusia cambrica* | 0 | 0 | 0 | 26 | 24 | 7 | 2 | 0 | 11.4 | Forest | Pupa |
| Geometridae | *Xanthorhoe biriviata* | 1 | 0 | 0 | 22 | 26 | 12 | 1 | 1 | 9.0 | Forest | Pupa |
| Geometridae | *Xanthorhoe designata* | 0 | 0 | 1 | 22 | 27 | 10 | 1 | 0 | 9.9 | Forest | Pupa |
| Geometridae | *Xanthorhoe ferrugata* | 1 | 1 | 1 | 21.5 | 28 | 12 | 3 | 2 | 8.8 | Generalist | Pupa |
| Geometridae | *Xanthorhoe fluctuata* | 1 | 1 | 1 | 25.5 | 32 | 13 | 3 | 1 | 8.5 | Generalist | Pupa |
| Geometridae | *Xanthorhoe montanata* | 0 | 0 | 0 | 28 | 30 | 6 | 3 | 2 | 10.7 | Generalist | Larva |
| Geometridae | *Xanthorhoe quadrifasiata* | 1 | 0 | 1 | 26.5 | 26 | 7 | 3 | 1 | 11.4 | Generalist | Larva |
| Geometridae | *Xanthorhoe spadicearia* | 0 | 0 | 0 | 21.5 | 28 | 11 | 3 | 1 | 10.0 | Forest | Pupa |
| Hepialidae | *Hepialus humuli* | 0 | 1 | 0 | 58.5 | 28 | 6 | 3 | 0 | 10.7 | Open | Larva |
| Hepialidae | *Korscheltellus fusconebulosa* | 0 | 0 | 0 | 39 | 28 | 7 | 3 | 1 | 11.4 | Generalist | Larva |
| Hepialidae | *Korscheltellus lupulina* | 0 | 0 | 1 | 30 | 28 | 5 | 3 | 0 | 8.0 | Generalist | Larva |
| Hepialidae | *Phymatopus hecta* | 0 | 0 | 0 | 26.5 | 27 | 8 | 3 | 0 | 11.1 | Generalist | Larva |
| Hepialidae | *Triodia sylvina* | 1 | 1 | 1 | 37.5 | 27 | 4 | 3 | 1 | 11.8 | Generalist | Larva |
| Lasiocampidae | *Cosmotriche lobulina* | NA | 0 | NA | 41 | 19 | 6 | 2 | 0 | 10.7 | Forest | Larva |
| Lasiocampidae | *Dendrolimus pini* | 0 | 0 | 0 | 61 | 29 | 5 | 2 | 1 | 11.8 | Forest | Larva |
| Lasiocampidae | *Eriogaster lanestris* | 0 | 0 | 0 | 38.5 | 28 | 3 | 3 | 0 | 3.0 | Generalist | Pupa |
| Lasiocampidae | *Euthrix potatoria* | 0 | 0 | 0 | 53 | 27 | 7 | 3 | 1 | 11.4 | Generalist | Larva |
| Lasiocampidae | *Gastropacha populifolia* | 0 | NA | NA | 68 | 21 | 8 | 2 | 1 | 11.4 | Generalist | Larva |
| Lasiocampidae | *Gastropacha quercifolia* | 0 | 0 | 0 | 65 | 30 | 5 | 3 | 0 | 11.2 | Forest | Larva |
| Lasiocampidae | *Lasiocampa quercus* | 0 | 0 | 0 | 59 | 33 | 5 | 3 | 1 | 11.8 | Generalist | Pupa |
| Lasiocampidae | *Lasiocampa trifolii* | 1 | 0 | 0 | 50 | 33 | 7 | 3 | 1 | 9.4 | Generalist | Egg |
| Lasiocampidae | *Macrothylacia rubi* | 0 | 1 | 0 | 50 | 30 | 5 | 3 | 0 | 8.0 | Generalist | Larva |
| Lasiocampidae | *Malacosoma castrensis* | 0 | 1 | 0 | 33 | 30 | 7 | 3 | 0 | 11.4 | Open | Egg |
| Lasiocampidae | *Malacosoma neustria* | 1 | 0 | 0 | 33 | 35 | 6 | 3 | 1 | 11.7 | Open | Egg |
| Lasiocampidae | *Odonestis pruni* | 0 | NA | NA | 57.5 | 24 | 8 | 2 | 1 | 11.4 | Generalist | Larva |
| Lasiocampidae | *Phyllodesma ilicifolia* | 1 | 0 | 0 | 35.5 | 27 | 6 | 3 | 0 | 7.5 | Generalist | Pupa |
| Lasiocampidae | *Phyllodesma tremulifolia* | 0 | NA | NA | 35 | 22 | 6 | 2 | 1 | 10.8 | Generalist | Pupa |
| Lasiocampidae | *Poecilocampa populi* | 0 | 1 | 0 | 36.5 | 28 | 3 | 3 | 0 | 3.0 | Generalist | Egg |
| Lasiocampidae | *Trichiura crataegi* | 0 | 0 | 0 | 31.5 | 30 | 5 | 3 | 0 | 8.0 | Generalist | Egg |
| Limacodidae | *Apoda limacodes* | 1 | 1 | 0 | 25 | 25 | 8 | 2 | 0 | 11.1 | Forest | Pupa |
| Limacodidae | *Heterogenea asella* | 0 | 0 | 0 | 15.5 | 27 | 7 | 2 | 0 | 11.4 | Forest | Pupa |
| Noctuidae | *Abrostola asclepiadis* | NA | 0 | NA | 33.5 | 24 | 6 | 1 | 0 | 10.7 | Generalist | Pupa |
| Noctuidae | *Abrostola tripartita* | 0 | 1 | 1 | 31 | 32 | 7 | 2 | 0 | 10.1 | Generalist | Pupa |
| Noctuidae | *Abrostola triplasia* | 1 | NA | NA | 32 | 34 | 10 | 2 | 0 | 9.9 | Generalist | Pupa |
| Noctuidae | *Acontia trabealis* | 0 | 1 | 0 | 23 | 34 | 8 | 2 | 0 | 10.8 | Open | Pupa |
| Noctuidae | *Acronicta aceris* | 1 | 1 | 1 | 43 | 32 | 8 | 3 | 0 | 9.6 | Forest | Pupa |
| Noctuidae | *Acronicta albovenosa* | 0 | 1 | 0 | 34 | 28 | 8 | 3 | 1 | 10.1 | Generalist | Pupa |
| Noctuidae | *Acronicta alni* | 0 | 1 | 1 | 36 | 27 | 6 | 3 | 2 | 10.7 | Forest | Pupa |
| Noctuidae | *Acronicta auricoma* | 1 | 1 | 0 | 35.5 | 27 | 4 | 3 | 1 | 8.5 | Generalist | Pupa |
| Noctuidae | *Acronicta cinerea* | 0 | 0 | 0 | 35 | 33 | 9 | 3 | 1 | 9.7 | Open | Pupa |
| Noctuidae | *Acronicta cuspis* | 0 | 0 | 0 | 39 | 26 | 8 | 2 | 0 | 11.1 | Forest | Pupa |
| Noctuidae | *Acronicta leporina* | 1 | 1 | 1 | 40 | 28 | 9 | 3 | 1 | 10.8 | Forest | Pupa |
| Noctuidae | *Acronicta megacephala* | 1 | 1 | 1 | 40 | 32 | 6 | 3 | 0 | 10.7 | Generalist | Pupa |
| Noctuidae | *Acronicta menyanthidis* | 0 | 0 | 0 | 39 | 21 | 8 | 3 | 0 | 9.6 | Generalist | Pupa |
| Noctuidae | *Acronicta psi* | 1 | 1 | 1 | 39.5 | 34 | 9 | 3 | 0 | 10.8 | Generalist | Pupa |
| Noctuidae | *Acronicta rumicis* | 1 | 0 | 1 | 37 | 34 | 12 | 3 | 1 | 9.3 | Generalist | Pupa |
| Noctuidae | *Acronicta strigosa* | 0 | 0 | 0 | 40 | 24 | 4 | 3 | 1 | 11.8 | Forest | Pupa |
| Noctuidae | *Acronicta tridens* | 0 | 0 | 0 | 39 | 30 | 7 | 3 | 0 | 11.4 | Generalist | Pupa |
| Noctuidae | *Actebia fennica* | 0 | NA | NA | 41 | 12 | 7 | 3 | 1 | 9.4 | Open | Larva |
| Noctuidae | *Actebia praecox* | 0 | 0 | 0 | 41.5 | 24 | 7 | 3 | 0 | 9.4 | Open | Larva |
| Noctuidae | *Actinotia polyodon* | 1 | 1 | 1 | 33 | 26 | 8 | 2 | 0 | 9.6 | Open | Pupa |
| Noctuidae | *Aedia funesta* | 1 | NA | NA | 32 | 30 | 8 | 3 | 0 | 11.1 | Generalist | Pupa |
| Noctuidae | *Agrochola circellaris* | 1 | 0 | 1 | 39 | 30 | 6 | 3 | 0 | 4.7 | Generalist | Egg |
| Noctuidae | *Agrochola helvola* | 0 | 0 | 0 | 39.5 | 32 | 6 | 3 | 0 | 4.7 | Forest | Egg |
| Noctuidae | *Agrochola laevis* | 0 | NA | NA | 35 | 16 | 12 | 2 | 0 | 4.7 | Forest | Egg |
| Noctuidae | *Agrochola litura* | 0 | 0 | 0 | 35 | 29 | 4 | 3 | 0 | 7.3 | Forest | Egg |
| Noctuidae | *Agrochola lota* | 1 | 0 | 1 | 35.5 | 29 | 6 | 3 | 0 | 4.7 | Forest | Egg |
| Noctuidae | *Agrochola lychnidis* | 1 | NA | NA | 37 | 31 | 6 | 3 | 1 | 4.7 | Generalist | Egg |
| Noctuidae | *Agrochola macilenta* | 1 | 0 | 1 | 34.5 | 30 | 2 | 3 | 1 | 2.5 | Forest | Egg |
| Noctuidae | *Agrochola nitida* | 0 | 0 | 0 | 34 | 20 | 5 | 3 | 0 | 8.0 | Forest | Egg |
| Noctuidae | *Agrotis bigramma* | 1 | NA | NA | 45 | 26 | 12 | 2 | 1 | 11.2 | Open | Larva |
| Noctuidae | *Agrotis cinerea* | 0 | 0 | 0 | 36.5 | 27 | 7 | 3 | 2 | 10.1 | Open | Larva |
| Noctuidae | *Agrotis clavis* | 1 | 1 | 1 | 37.5 | 29 | 5 | 3 | 1 | 11.2 | Generalist | Larva |
| Noctuidae | *Agrotis exclamationis* | 1 | NA | NA | 40 | 33 | 16 | 3 | 1 | 8.3 | Generalist | Larva |
| Noctuidae | *Agrotis ipsilon* | 1 | NA | NA | 48 | 36 | 16 | 3 | 1 | 8.3 | Generalist | Larva |
| Noctuidae | *Agrotis ripae* | 0 | NA | 0 | 38.5 | 15 | 6 | 3 | 1 | 10.7 | Generalist | Larva |
| Noctuidae | *Agrotis segetum* | 1 | 1 | 1 | 38 | 35 | 17 | 3 | 2 | 8.1 | Generalist | Larva |
| Noctuidae | *Agrotis vestigialis* | 0 | 0 | 0 | 38 | 29 | 6 | 3 | 1 | 8.7 | Open | Larva |
| Noctuidae | *Allophyes oxyacanthae* | 0 | 0 | 0 | 41 | 28 | 6 | 2 | 0 | 4.7 | Generalist | Egg |
| Noctuidae | *Ammoconia caecimacula* | 0 | 1 | 0 | 41.5 | 25 | 7 | 3 | 0 | 5.4 | Generalist | Egg |
| Noctuidae | *Amphipoea crinanensis* | 0 | 0 | 0 | 30 | 9 | 7 | 1 | 1 | 9.4 | Generalist | Egg |
| Noctuidae | *Amphipoea fucosa* | 0 | 1 | 1 | 33 | 26 | 8 | 3 | 1 | 9.8 | Generalist | Egg |
| Noctuidae | *Amphipoea lucens* | 0 | 0 | 0 | 33 | 20 | 7 | 3 | 1 | 9.4 | Generalist | Egg |
| Noctuidae | *Amphipoea oculea* | 0 | 1 | 1 | 30 | 28 | 7 | 3 | 1 | 9.4 | Generalist | Egg |
| Noctuidae | *Amphipyra berbera* | 0 | 1 | 1 | 49.5 | 26 | 4 | 3 | 0 | 11.8 | Forest | Egg |
| Noctuidae | *Amphipyra perflua* | 0 | 0 | 0 | 50.5 | 23 | 4 | 2 | 0 | 11.8 | Forest | Egg |
| Noctuidae | *Amphipyra pyramidea* | 1 | 1 | 1 | 49.5 | 33 | 6 | 3 | 0 | 8.7 | Generalist | Egg |
| Noctuidae | *Amphipyra tragopoginis* | 1 | 0 | 1 | 37 | 33 | 9 | 3 | 0 | 6.8 | Generalist | Egg |
| Noctuidae | *Anaplectoides prasina* | 0 | 1 | 0 | 48 | 26 | 7 | 3 | 0 | 11.4 | Forest | Larva |
| Noctuidae | *Anarta myrtilli* | 0 | 0 | 0 | 24 | 27 | 11 | 2 | 0 | 9.6 | Open | Pupa |
| Noctuidae | *Anarta trifolii* | 1 | 1 | 1 | 33.5 | 35 | 13 | 3 | 1 | 9.5 | Generalist | Pupa |
| Noctuidae | *Anorthoa munda* | 0 | 0 | 1 | 41 | 26 | 5 | 3 | 0 | 5.0 | Forest | Pupa |
| Noctuidae | *Antitype chi* | 0 | 0 | 0 | 36 | 30 | 5 | 3 | 0 | 8.0 | Open | Egg |
| Noctuidae | *Apamea anceps* | 1 | 0 | 0 | 40.5 | 30 | 5 | 3 | 0 | 11.2 | Open | Larva |
| Noctuidae | *Apamea crenata* | 0 | 1 | 1 | 41.5 | 28 | 7 | 3 | 2 | 10.1 | Generalist | Larva |
| Noctuidae | *Apamea epomidion* | 1 | 0 | 0 | 41.5 | 26 | 8 | 2 | 0 | 11.1 | Forest | Larva |
| Noctuidae | *Apamea furva* | 1 | 1 | 0 | 38 | 29 | 6 | 3 | 0 | 11.7 | Generalist | Larva |
| Noctuidae | *Apamea illyria* | 1 | 0 | 0 | 33.5 | 26 | 4 | 3 | 0 | 8.5 | Forest | Larva |
| Noctuidae | *Apamea lateritia* | 0 | 1 | 1 | 46 | 27 | 6 | 3 | 0 | 11.7 | Open | Larva |
| Noctuidae | *Apamea lithoxylaea* | 1 | 1 | 1 | 47 | 30 | 6 | 3 | 0 | 11.7 | Open | Larva |
| Noctuidae | *Apamea monoglypha* | 1 | 1 | 1 | 48.5 | 33 | 10 | 3 | 1 | 9.9 | Generalist | Larva |
| Noctuidae | *Apamea oblonga* | 1 | 1 | 0 | 45.5 | 25 | 5 | 3 | 1 | 11.8 | Generalist | Larva |
| Noctuidae | *Apamea remissa* | 1 | 1 | 1 | 38 | 28 | 8 | 3 | 2 | 11.1 | Generalist | Larva |
| Noctuidae | *Apamea rubrirena* | NA | 0 | NA | 41.5 | 20 | 6 | 3 | 0 | 11.7 | Forest | Larva |
| Noctuidae | *Apamea scolopacina* | 1 | 1 | 0 | 33 | 27 | 6 | 3 | 1 | 11.7 | Forest | Larva |
| Noctuidae | *Apamea sordens* | 1 | 1 | 1 | 35 | 29 | 6 | 3 | 0 | 10.7 | Generalist | Larva |
| Noctuidae | *Apamea sublustris* | 0 | 0 | 0 | 43 | 28 | 5 | 3 | 0 | 11.2 | Open | Larva |
| Noctuidae | *Apamea unanimis* | 1 | 1 | 1 | 34 | 29 | 6 | 3 | 0 | 10.7 | Open | Larva |
| Noctuidae | *Aporophyla lueneburgensis* | 0 | 0 | 0 | 39 | 27 | 4 | 3 | 2 | 7.3 | Open | Egg |
| Noctuidae | *Aporophyla nigra* | 0 | NA | NA | 44 | 26 | 8 | 3 | 1 | 7.3 | Open | Larva |
| Noctuidae | *Archanara dissoluta* | 1 | 1 | 0 | 29.5 | 24 | 7 | 1 | 1 | 9.4 | Generalist | Egg |
| Noctuidae | *Arenostola phragmitidis* | 0 | 1 | 0 | 31.5 | 21 | 5 | 1 | 0 | 11.8 | Generalist | Egg |
| Noctuidae | *Asteroscopus sphinx* | 0 | 0 | 0 | 43.5 | 23 | 3 | 3 | 0 | 3.0 | Forest | Egg |
| Noctuidae | *Atethmia centrago* | 1 | NA | NA | 34 | 22 | 12 | 1 | 2 | 7.3 | Forest | Egg |
| Noctuidae | *Atypha pulmonaris* | 0 | NA | NA | 27 | 18 | 16 | 2 | 0 | 10.7 | Forest | Egg |
| Noctuidae | *Autographa bractea* | 0 | 0 | 0 | 47 | 25 | 6 | 3 | 0 | 11.7 | Open | Larva |
| Noctuidae | *Autographa buraetica* | 0 | 1 | 1 | 39 | 11 | 7 | 3 | 0 | 11.2 | Generalist | Larva |
| Noctuidae | *Autographa gamma* | 1 | NA | NA | 42 | 36 | 13 | 3 | 0 | 9.5 | Generalist | Larva |
| Noctuidae | *Autographa jota* | 0 | 0 | 1 | 44.5 | 28 | 5 | 3 | 0 | 11.2 | Generalist | Larva |
| Noctuidae | *Autographa mandarina* | 0 | NA | NA | 36 | 8 | 11 | 3 | 0 | 9.5 | Generalist | Larva |
| Noctuidae | *Autographa pulchrina* | 0 | 0 | 0 | 39 | 29 | 6 | 3 | 0 | 10.7 | Generalist | Larva |
| Noctuidae | *Axylia putris* | 1 | 1 | 1 | 35 | 32 | 14 | 3 | 0 | 7.8 | Generalist | Pupa |
| Noctuidae | *Brachionycha nubeculosa* | 1 | 0 | 0 | 52.5 | 24 | 6 | 3 | 0 | 4.5 | Forest | Pupa |
| Noctuidae | *Brachylomia viminalis* | 0 | 0 | 0 | 31 | 29 | 8 | 3 | 0 | 9.8 | Forest | Egg |
| Noctuidae | *Bryophila domestica* | 0 | 0 | 0 | 26 | 28 | 5 | 3 | 0 | 11.8 | Generalist | Larva |
| Noctuidae | *Bryophila ereptricula* | 1 | NA | NA | 27 | 20 | 7 | 3 | 1 | 12.3 | Generalist | Larva |
| Noctuidae | *Bryophila raptricula* | 0 | 0 | 0 | 31 | 33 | 7 | 3 | 1 | 11.8 | Generalist | Larva |
| Noctuidae | *Calamia tridens* | 0 | 0 | 0 | 39 | 28 | 6 | 2 | 0 | 8.7 | Open | Egg |
| Noctuidae | *Callopistria juventina* | 0 | NA | NA | 36 | 27 | 12 | 1 | 0 | 11.4 | Generalist | Larva |
| Noctuidae | *Calophasia lunula* | 0 | 1 | 0 | 29 | 29 | 10 | 1 | 0 | 10.4 | Generalist | Pupa |
| Noctuidae | *Caradrina clavipalpis* | 1 | 1 | 1 | 29.5 | 36 | 18 | 3 | 1 | 7.9 | Generalist | Pupa |
| Noctuidae | *Caradrina montana* | 1 | 1 | 0 | 28.5 | 17 | 5 | 3 | 0 | 11.8 | Forest | Larva |
| Noctuidae | *Caradrina morpheus* | 1 | 1 | 1 | 30.5 | 30 | 9 | 3 | 1 | 10.8 | Generalist | Larva |
| Noctuidae | *Caradrina selini* | 1 | 1 | 0 | 29.5 | 29 | 6 | 3 | 0 | 10.7 | Forest | Larva |
| Noctuidae | *Catephia alchymista* | 1 | NA | NA | 40 | 25 | 20 | 1 | 1 | 11.8 | Forest | Pupa |
| Noctuidae | *Catocala fulminea* | 1 | NA | NA | 49 | 22 | 12 | 3 | 1 | 8.7 | Generalist | Egg |
| Noctuidae | *Celaena haworthii* | 0 | 1 | 0 | 27.5 | 18 | 6 | 3 | 0 | 8.7 | Generalist | Egg |
| Noctuidae | *Ceramica pisi* | 0 | 1 | 1 | 38.5 | 29 | 7 | 3 | 1 | 10.1 | Generalist | Pupa |
| Noctuidae | *Cerapteryx graminis* | 0 | 1 | 1 | 31 | 28 | 9 | 3 | 0 | 9.9 | Generalist | Egg |
| Noctuidae | *Cerastis leucographa* | 0 | 0 | 0 | 35 | 20 | 6 | 3 | 0 | 4.5 | Forest | Pupa |
| Noctuidae | *Cerastis rubricosa* | 0 | 1 | 0 | 35 | 33 | 6 | 3 | 0 | 4.5 | Forest | Pupa |
| Noctuidae | *Charanyca trigrammica* | 1 | 1 | 1 | 35 | 31 | 6 | 2 | 0 | 10.7 | Open | Larva |
| Noctuidae | *Chersotis cuprea* | 0 | 0 | 0 | 36 | 24 | 6 | 3 | 0 | 8.7 | Open | Larva |
| Noctuidae | *Chilodes maritima* | 1 | 0 | 0 | 30.5 | 26 | 4 | 2 | 2 | 10.7 | Generalist | Larva |
| Noctuidae | *Chloantha hyperici* | 1 | NA | NA | 30 | 32 | 10 | 3 | 0 | 9.9 | Generalist | Pupa |
| Noctuidae | *Chrysodeixis chalcites* | 0 | NA | NA | 37 | 24 | 16 | 3 | 0 | 9.9 | Generalist | Larva |
| Noctuidae | *Cirrhia gilvago* | 1 | 0 | 1 | 36 | 29 | 6 | 1 | 1 | 4.7 | Open | Egg |
| Noctuidae | *Cirrhia icteritia* | 1 | 0 | 1 | 36 | 28 | 6 | 3 | 1 | 8.7 | Forest | Egg |
| Noctuidae | *Cirrhia ocellaris* | 1 | 0 | 1 | 36.5 | 24 | 5 | 1 | 1 | 4.0 | Generalist | Egg |
| Noctuidae | *Coenobia rufa* | 0 | NA | 0 | 23.5 | 16 | 4 | 1 | 0 | 11.8 | Generalist | Egg |
| Noctuidae | *Coenophila subrosea* | 0 | 0 | 0 | 38 | 14 | 4 | 3 | 0 | 11.8 | Generalist | Larva |
| Noctuidae | *Colocasia coryli* | 1 | 0 | 0 | 34 | 32 | 4 | 3 | 1 | 8.5 | Forest | Pupa |
| Noctuidae | *Conisania leineri* | 0 | NA | 0 | 35.5 | 14 | 4 | 1 | 0 | 8.5 | Generalist | Pupa |
| Noctuidae | *Conistra erythrocephala* | 0 | 0 | 0 | 37 | 30 | 11 | 3 | 2 | 4.3 | Forest | Imago |
| Noctuidae | *Conistra rubiginea* | 0 | 0 | 0 | 35 | 31 | 10 | 3 | 0 | 4.1 | Generalist | Imago |
| Noctuidae | *Conistra rubiginosa* | 1 | 1 | 1 | 33.5 | 26 | 10 | 3 | 0 | 4.1 | Forest | Imago |
| Noctuidae | *Conistra vaccinii* | 1 | 1 | 1 | 33 | 29 | 10 | 3 | 2 | 4.1 | Generalist | Imago |
| Noctuidae | *Coranarta cordigera* | 0 | 0 | 0 | 25.5 | 20 | 4 | 2 | 0 | 8.5 | Generalist | Pupa |
| Noctuidae | *Cosmia affinis* | 1 | NA | NA | 30 | 26 | 5 | 1 | 0 | 8.0 | Forest | Egg |
| Noctuidae | *Cosmia pyralina* | 1 | 0 | 1 | 30 | 25 | 5 | 2 | 0 | 11.8 | Forest | Egg |
| Noctuidae | *Cosmia trapezina* | 1 | 1 | 1 | 30.5 | 33 | 8 | 3 | 2 | 9.8 | Generalist | Egg |
| Noctuidae | *Craniophora ligustri* | 1 | 0 | 1 | 36.5 | 32 | 9 | 3 | 1 | 10.8 | Forest | Pupa |
| Noctuidae | *Cryphia algae* | 1 | NA | NA | 27 | 29 | 5 | 3 | 1 | 8.0 | Generalist | Larva |
| Noctuidae | *Cryphia fraudatricula* | 0 | NA | NA | 37.5 | 16 | 8 | 2 | 0 | 8.0 | Open | Larva |
| Noctuidae | *Crypsedra gemmea* | 0 | 0 | 0 | 40 | 21 | 6 | 3 | 0 | 8.7 | Open | Egg |
| Noctuidae | *Cucullia absinthii* | 0 | 0 | 0 | 43 | 26 | 6 | 2 | 0 | 11.7 | Generalist | Pupa |
| Noctuidae | *Cucullia argentea* | 0 | NA | NA | 43 | 21 | 6 | 1 | 0 | 11.7 | Open | Pupa |
| Noctuidae | *Cucullia artemisiae* | 0 | NA | NA | 42 | 24 | 5 | 2 | 0 | 11.8 | Generalist | Pupa |
| Noctuidae | *Cucullia asteris* | 0 | 0 | 0 | 44 | 25 | 7 | 2 | 0 | 11.4 | Open | Pupa |
| Noctuidae | *Cucullia chamomillae* | 0 | 0 | 0 | 46.5 | 31 | 4 | 2 | 0 | 5.5 | Open | Pupa |
| Noctuidae | *Cucullia fraudatrix* | 0 | 0 | 0 | 38 | 16 | 6 | 2 | 0 | 11.7 | Generalist | Pupa |
| Noctuidae | *Cucullia gnaphalii* | 0 | 0 | 0 | 37.5 | 21 | 5 | 2 | 0 | 11.2 | Open | Pupa |
| Noctuidae | *Cucullia lactucae* | 0 | 0 | 0 | 46 | 26 | 8 | 2 | 0 | 11.1 | Forest | Pupa |
| Noctuidae | *Cucullia lucifuga* | 0 | 0 | 0 | 46 | 24 | 6 | 2 | 0 | 10.7 | Forest | Pupa |
| Noctuidae | *Cucullia lychnitis* | 0 | 0 | 0 | 40 | 26 | 7 | 1 | 0 | 11.4 | Generalist | Pupa |
| Noctuidae | *Cucullia praecana* | 0 | NA | 0 | 42 | 7 | 4 | 2 | 0 | 11.8 | Open | Pupa |
| Noctuidae | *Cucullia scrophulariae* | 0 | NA | NA | 42.5 | 29 | 7 | 1 | 0 | 10.1 | Generalist | Pupa |
| Noctuidae | *Cucullia tanaceti* | 0 | NA | NA | 44 | 24 | 7 | 2 | 0 | 10.1 | Generalist | Pupa |
| Noctuidae | *Cucullia umbratica* | 1 | 1 | 1 | 52 | 29 | 6 | 3 | 0 | 11.7 | Generalist | Pupa |
| Noctuidae | *Cucullia verbasci* | 1 | 0 | 0 | 51.5 | 31 | 6 | 1 | 0 | 7.5 | Generalist | Pupa |
| Noctuidae | *Dasypolia templi* | 0 | 0 | 0 | 48 | 25 | 7 | 3 | 0 | 3.3 | Generalist | Imago |
| Noctuidae | *Deltote bankiana* | 0 | 0 | 0 | 22 | 25 | 7 | 2 | 0 | 11.4 | Open | Pupa |
| Noctuidae | *Deltote deceptoria* | 0 | 0 | 0 | 23.5 | 20 | 6 | 2 | 0 | 10.7 | Forest | Pupa |
| Noctuidae | *Deltote pygarga* | 0 | 0 | 0 | 24.5 | 33 | 6 | 2 | 0 | 10.7 | Forest | Pupa |
| Noctuidae | *Deltote uncula* | 0 | 0 | 0 | 24 | 26 | 6 | 2 | 0 | 10.7 | Generalist | Pupa |
| Noctuidae | *Denticucullus pygmina* | 0 | 0 | 0 | 24 | 32 | 6 | 2 | 1 | 8.7 | Open | Egg |
| Noctuidae | *Diachrysia chrysitis* | 1 | 1 | 1 | 33 | 34 | 10 | 3 | 0 | 9.3 | Generalist | Larva |
| Noctuidae | *Diachrysia chryson* | 0 | NA | NA | 48 | 22 | 10 | 3 | 0 | 9.9 | Generalist | Larva |
| Noctuidae | *Diarsia brunnea* | 0 | 1 | 1 | 40.5 | 26 | 7 | 3 | 0 | 11.4 | Generalist | Larva |
| Noctuidae | *Diarsia dahlii* | 0 | 0 | 0 | 34 | 22 | 6 | 3 | 1 | 8.7 | Forest | Larva |
| Noctuidae | *Diarsia florida* | 0 | 0 | 1 | 33.5 | 20 | 7 | 3 | 0 | 11.4 | Generalist | Pupa |
| Noctuidae | *Diarsia mendica* | 1 | 0 | 0 | 33.5 | 29 | 4 | 3 | 2 | 5.5 | Generalist | Larva |
| Noctuidae | *Diarsia rubi* | 0 | 1 | 1 | 32 | 27 | 13 | 3 | 1 | 7.3 | Generalist | Larva |
| Noctuidae | *Dicycla oo* | 1 | NA | NA | 31 | 26 | 6 | 2 | 1 | 11.7 | Forest | Larva |
| Noctuidae | *Diloba caeruleocephala* | 0 | 0 | 0 | 38 | 32 | 4 | 3 | 0 | 3.5 | Forest | Egg |
| Noctuidae | *Dryobotodes eremita* | 1 | 0 | 0 | 36 | 32 | 4 | 2 | 1 | 7.3 | Forest | Egg |
| Noctuidae | *Dypterygia scabriuscula* | 1 | 1 | 0 | 37.5 | 30 | 6 | 2 | 0 | 10.7 | Forest | Pupa |
| Noctuidae | *Egira conspicillaris* | 1 | NA | NA | 40 | 25 | 12 | 3 | 2 | 3.0 | Generalist | Pupa |
| Noctuidae | *Elaphria venustula* | 0 | 0 | 0 | 20 | 29 | 5 | 3 | 0 | 11.2 | Forest | Larva |
| Noctuidae | *Enargia paleacea* | 1 | 1 | 0 | 41.5 | 26 | 7 | 3 | 0 | 9.4 | Generalist | Egg |
| Noctuidae | *Epilecta linogrisea* | 0 | 0 | 0 | 38 | 26 | 5 | 3 | 0 | 11.8 | Generalist | Larva |
| Noctuidae | *Epipsilia grisescens* | 1 | 0 | 0 | 34.5 | 19 | 4 | 3 | 0 | 11.8 | Generalist | Egg |
| Noctuidae | *Episema glaucina* | 0 | NA | NA | 36 | 19 | 8 | 1 | 1 | 10.1 | Open | Larva |
| Noctuidae | *Eremobia ochroleuca* | 0 | 0 | 0 | 34.5 | 29 | 7 | 3 | 0 | 9.4 | Open | Larva |
| Noctuidae | *Eremohadena immunda* | 0 | NA | NA | 40.5 | 7 | 5 | 3 | 0 | 11.8 | Generalist | Egg |
| Noctuidae | *Eriopygodes imbecilla* | 0 | NA | 0 | 26 | 22 | 5 | 1 | 0 | 11.2 | Open | Larva |
| Noctuidae | *Eucarta virgo* | 0 | NA | NA | 30 | 11 | 12 | 2 | 0 | 11.1 | Generalist | Pupa |
| Noctuidae | *Eugnorisma depuncta* | 0 | 0 | 0 | 39 | 23 | 4 | 3 | 0 | 11.8 | Forest | Larva |
| Noctuidae | *Eugnorisma glareosa* | 0 | 0 | 0 | 33.5 | 20 | 5 | 2 | 1 | 8.0 | Open | Larva |
| Noctuidae | *Eugraphe sigma* | 0 | 0 | 1 | 40 | 24 | 6 | 3 | 0 | 11.7 | Open | Larva |
| Noctuidae | *Euplexia lucipara* | 1 | 0 | 1 | 34.5 | 32 | 9 | 3 | 0 | 10.8 | Forest | Pupa |
| Noctuidae | *Eupsilia transversa* | 1 | 1 | 1 | 44 | 30 | 10 | 3 | 1 | 4.1 | Generalist | Imago |
| Noctuidae | *Eurois occulta* | 0 | 1 | 1 | 58.5 | 26 | 10 | 3 | 1 | 9.9 | Forest | Larva |
| Noctuidae | *Euxoa aquilina* | 0 | NA | NA | 35 | 20 | 20 | 2 | 1 | 11.4 | Open | Larva |
| Noctuidae | *Euxoa cursoria* | 0 | 0 | 0 | 35.5 | 15 | 8 | 3 | 2 | 9.8 | Open | Larva |
| Noctuidae | *Euxoa nigricans* | 1 | 1 | 1 | 34 | 31 | 7 | 3 | 0 | 9.4 | Generalist | Larva |
| Noctuidae | *Euxoa obelisca* | 1 | 1 | 1 | 33.5 | 32 | 7 | 3 | 0 | 9.4 | Open | Larva |
| Noctuidae | *Euxoa recussa* | 0 | 0 | 0 | 36 | 20 | 5 | 3 | 1 | 11.8 | Open | Larva |
| Noctuidae | *Euxoa tritici* | 1 | 1 | 1 | 34 | 33 | 8 | 3 | 2 | 9.8 | Generalist | Larva |
| Noctuidae | *Fabula zollikoferi* | 0 | NA | NA | 50.5 | 21 | 7 | 3 | 1 | 5.4 | Generalist | Larva |
| Noctuidae | *Fissipunctia ypsillon* | 1 | 1 | 1 | 37 | 33 | 5 | 2 | 1 | 11.8 | Forest | Egg |
| Noctuidae | *Globia algae* | 0 | 0 | 1 | 37 | 27 | 4 | 1 | 0 | 8.8 | Generalist | Egg |
| Noctuidae | *Globia sparganii* | 1 | 0 | 0 | 35.5 | 26 | 6 | 1 | 0 | 8.7 | Generalist | Egg |
| Noctuidae | *Gortyna flavago* | 0 | 0 | 0 | 37.5 | 32 | 8 | 2 | 0 | 6.1 | Generalist | Egg |
| Noctuidae | *Graphiphora augur* | 0 | 0 | 1 | 43 | 26 | 7 | 3 | 0 | 11.4 | Generalist | Larva |
| Noctuidae | *Griposia aprilina* | 0 | 0 | 1 | 47 | 31 | 6 | 2 | 0 | 4.7 | Forest | Egg |
| Noctuidae | *Hada plebeja* | 0 | 0 | 0 | 33.5 | 31 | 6 | 3 | 1 | 9.5 | Open | Pupa |
| Noctuidae | *Hadena albimacula* | 0 | 0 | 0 | 34 | 29 | 4 | 2 | 0 | 8.5 | Open | Pupa |
| Noctuidae | *Hadena bicruris* | 1 | 1 | 0 | 36.5 | 33 | 13 | 2 | 0 | 9.5 | Generalist | Pupa |
| Noctuidae | *Hadena caesia* | 0 | NA | 0 | 34 | 18 | 6 | 1 | 0 | 10.7 | Generalist | Larva |
| Noctuidae | *Hadena compta* | 1 | 0 | 0 | 30.5 | 31 | 8 | 2 | 0 | 11.1 | Generalist | Pupa |
| Noctuidae | *Hadena confusa* | 0 | 0 | 0 | 34 | 32 | 10 | 2 | 0 | 10.4 | Open | Pupa |
| Noctuidae | *Hadena filograna* | 0 | 0 | 0 | 34 | 24 | 6 | 1 | 0 | 10.7 | Open | Pupa |
| Noctuidae | *Hadena irregularis* | 0 | NA | NA | 29 | 20 | 5 | 2 | 0 | 11.2 | Open | Pupa |
| Noctuidae | *Hadena luteago* | 1 | NA | NA | 35.5 | 23 | 12 | 2 | 2 | 11.2 | Open | Pupa |
| Noctuidae | *Hadena perplexa* | 0 | 0 | 1 | 32 | 33 | 7 | 2 | 0 | 10.1 | Open | Pupa |
| Noctuidae | *Hecatera bicolorata* | 1 | 0 | 0 | 30.5 | 34 | 4 | 3 | 2 | 8.5 | Open | Pupa |
| Noctuidae | *Hecatera dysodea* | 1 | NA | 1 | 30.5 | 28 | 7 | 1 | 1 | 10.1 | Generalist | Pupa |
| Noctuidae | *Helicoverpa armigera* | 0 | NA | NA | 35 | 33 | 13 | 3 | 0 | 8.3 | Generalist | Pupa |
| Noctuidae | *Heliothis maritima* | 0 | NA | NA | 30 | 23 | 6 | 2 | 0 | 11.1 | Generalist | Pupa |
| Noctuidae | *Heliothis peltigera* | 0 | NA | NA | 38 | 33 | 16 | 3 | 0 | 8.3 | Generalist | Pupa |
| Noctuidae | *Heliothis viriplaca* | 1 | 0 | 0 | 31.5 | 31 | 10 | 1 | 0 | 10.4 | Open | Pupa |
| Noctuidae | *Helotropha leucostigma* | 0 | 1 | 1 | 36 | 28 | 7 | 3 | 2 | 9.4 | Generalist | Egg |
| Noctuidae | *Hoplodrina ambigua* | 1 | NA | 1 | 31 | 33 | 6 | 3 | 0 | 8.7 | Open | Larva |
| Noctuidae | *Hoplodrina blanda* | 1 | 1 | 1 | 33 | 33 | 7 | 3 | 0 | 11.4 | Open | Larva |
| Noctuidae | *Hoplodrina octogenaria* | 1 | 1 | 1 | 33.5 | 32 | 7 | 3 | 0 | 11.4 | Generalist | Larva |
| Noctuidae | *Hoplodrina respersa* | 1 | NA | NA | 31 | 25 | 12 | 3 | 2 | 11.4 | Generalist | Larva |
| Noctuidae | *Hydraecia micacea* | 1 | 1 | 1 | 38 | 26 | 10 | 3 | 1 | 7.5 | Generalist | Egg |
| Noctuidae | *Hydraecia nordstroemi* | 0 | 1 | 0 | 33 | 6 | 8 | 3 | 1 | 9.8 | Generalist | Egg |
| Noctuidae | *Hydraecia petasitis* | 0 | NA | 0 | 46 | 23 | 5 | 1 | 0 | 8.0 | Generalist | Egg |
| Noctuidae | *Hydraecia ultima* | 0 | 1 | 0 | 37 | 12 | 4 | 1 | 1 | 11.8 | Generalist | Egg |
| Noctuidae | *Hydrillula pallustris* | 0 | 0 | 0 | 29 | 24 | 4 | 2 | 1 | 8.5 | Open | Larva |
| Noctuidae | *Hypocoena stigmatica* | 0 | NA | NA | 26 | 25 | 4 | 2 | 1 | 11.8 | Open | Larva |
| Noctuidae | *Hyppa rectilinea* | 0 | 0 | 0 | 37.5 | 26 | 6 | 3 | 1 | 10.7 | Forest | Larva |
| Noctuidae | *Ipimorpha retusa* | 0 | 0 | 0 | 29.5 | 27 | 7 | 2 | 0 | 9.4 | Forest | Egg |
| Noctuidae | *Ipimorpha subtusa* | 1 | 0 | 1 | 31 | 27 | 7 | 3 | 0 | 9.4 | Forest | Egg |
| Noctuidae | *Jodia croceago* | 0 | NA | NA | 35.5 | 26 | 5 | 2 | 0 | 6.1 | Generalist | Imago |
| Noctuidae | *Lacanobia aliena* | 0 | NA | NA | 47 | 18 | 10 | 2 | 0 | 9.0 | Generalist | Pupa |
| Noctuidae | *Lacanobia contigua* | 1 | 1 | 1 | 38.5 | 28 | 9 | 3 | 0 | 10.8 | Generalist | Pupa |
| Noctuidae | *Lacanobia oleracea* | 1 | 1 | 1 | 39 | 34 | 13 | 3 | 0 | 9.5 | Generalist | Pupa |
| Noctuidae | *Lacanobia splendens* | 0 | NA | NA | 35 | 23 | 8 | 3 | 1 | 10.8 | Forest | Pupa |
| Noctuidae | *Lacanobia suasa* | 1 | 1 | 1 | 39.5 | 27 | 13 | 3 | 2 | 9.5 | Generalist | Pupa |
| Noctuidae | *Lacanobia thalassina* | 1 | 1 | 1 | 39.5 | 29 | 7 | 3 | 0 | 10.1 | Generalist | Pupa |
| Noctuidae | *Lacanobia w-latinum* | 1 | 1 | 1 | 43 | 29 | 4 | 2 | 0 | 8.5 | Generalist | Pupa |
| Noctuidae | *Lamprotes c-aureum* | 0 | NA | NA | 38 | 21 | 5 | 1 | 0 | 11.8 | Forest | Larva |
| Noctuidae | *Lasionhada proxima* | 0 | 0 | 0 | 32 | 23 | 9 | 3 | 0 | 10.8 | Generalist | Larva |
| Noctuidae | *Lateroligia ophiogramma* | 1 | 0 | 1 | 31.5 | 26 | 6 | 3 | 2 | 11.7 | Forest | Larva |
| Noctuidae | *Lenisa geminipuncta* | 1 | 1 | 1 | 31 | 29 | 6 | 1 | 1 | 8.7 | Generalist | Egg |
| Noctuidae | *Leucania comma* | 0 | 0 | 1 | 33 | 30 | 9 | 3 | 0 | 10.8 | Open | Larva |
| Noctuidae | *Leucania obsoleta* | 1 | 1 | 0 | 34 | 28 | 12 | 3 | 0 | 9.3 | Generalist | Larva |
| Noctuidae | *Lithophane consocia* | 0 | 0 | 0 | 45.5 | 18 | 11 | 2 | 0 | 4.3 | Generalist | Imago |
| Noctuidae | *Lithophane furcifera* | 0 | 0 | 0 | 45 | 27 | 12 | 2 | 0 | 4.6 | Forest | Imago |
| Noctuidae | *Lithophane lamda* | 0 | 0 | 0 | 41 | 20 | 12 | 2 | 0 | 4.6 | Generalist | Imago |
| Noctuidae | *Lithophane ornitopus* | 0 | 0 | 0 | 38 | 30 | 11 | 2 | 1 | 4.3 | Forest | Imago |
| Noctuidae | *Lithophane semibrunnea* | 0 | NA | NA | 40.5 | 23 | 7 | 2 | 0 | 4.1 | Generalist | Egg |
| Noctuidae | *Lithophane socia* | 1 | 0 | 0 | 43 | 27 | 12 | 3 | 0 | 4.6 | Forest | Imago |
| Noctuidae | *Litoligia literosa* | 0 | 0 | 0 | 25.5 | 27 | 5 | 2 | 1 | 11.8 | Open | Larva |
| Noctuidae | *Longalatedes elymi* | 0 | NA | 0 | 35 | 14 | 6 | 1 | 0 | 11.7 | Generalist | Larva |
| Noctuidae | *Luperina testacea* | 1 | 1 | 1 | 36 | 28 | 6 | 3 | 1 | 8.7 | Generalist | Larva |
| Noctuidae | *Lycophotia molothina* | 0 | NA | NA | 39 | 13 | 10 | 1 | 1 | 11.4 | Generalist | Larva |
| Noctuidae | *Lycophotia porphyrea* | 0 | 1 | 0 | 29 | 28 | 7 | 3 | 0 | 11.4 | Generalist | Larva |
| Noctuidae | *Macdunnoughia confusa* | 1 | NA | NA | 39 | 31 | 14 | 3 | 0 | 9.2 | Generalist | Larva |
| Noctuidae | *Mamestra brassicae* | 1 | 1 | 1 | 43.5 | 34 | 15 | 3 | 1 | 8.3 | Generalist | Pupa |
| Noctuidae | *Meganephria bimaculosa* | 0 | NA | NA | 54 | 15 | 8 | 2 | 1 | 8.3 | Forest | Egg |
| Noctuidae | *Melanchra persicariae* | 1 | 0 | 1 | 43 | 28 | 8 | 3 | 1 | 11.1 | Generalist | Pupa |
| Noctuidae | *Mesapamea secalis* | 1 | 1 | 1 | 33 | 32 | 6 | 3 | 2 | 11.7 | Generalist | Larva |
| Noctuidae | *Mesogona oxalina* | 0 | NA | NA | 36.5 | 23 | 4 | 2 | 0 | 7.3 | Generalist | Egg |
| Noctuidae | *Mesoligia furuncula* | 1 | 1 | 1 | 23 | 32 | 5 | 3 | 1 | 11.8 | Generalist | Larva |
| Noctuidae | *Mniotype adusta* | 1 | 0 | 0 | 41.5 | 33 | 6 | 3 | 0 | 10.7 | Open | Larva |
| Noctuidae | *Mniotype satura* | 0 | 0 | 1 | 46 | 27 | 5 | 3 | 0 | 8.0 | Forest | Egg |
| Noctuidae | *Moma alpium* | 0 | 1 | 0 | 34 | 26 | 4 | 3 | 0 | 11.8 | Forest | Pupa |
| Noctuidae | *Mormo maura* | 0 | NA | NA | 60 | 28 | 16 | 3 | 0 | 9.6 | Forest | Larva |
| Noctuidae | *Mythimna albipuncta* | 1 | 0 | 1 | 34 | 32 | 9 | 3 | 0 | 9.7 | Open | Larva |
| Noctuidae | *Mythimna conigera* | 1 | 1 | 1 | 34.5 | 30 | 7 | 3 | 0 | 11.4 | Generalist | Larva |
| Noctuidae | *Mythimna ferrago* | 1 | 1 | 1 | 38.5 | 34 | 7 | 3 | 0 | 11.4 | Generalist | Larva |
| Noctuidae | *Mythimna impura* | 1 | 1 | 1 | 32.5 | 27 | 7 | 3 | 0 | 11.4 | Generalist | Larva |
| Noctuidae | *Mythimna l-album* | 1 | NA | 0 | 33 | 31 | 9 | 3 | 0 | 7.2 | Open | Egg |
| Noctuidae | *Mythimna litoralis* | 0 | NA | 0 | 37 | 12 | 7 | 3 | 0 | 11.4 | Generalist | Larva |
| Noctuidae | *Mythimna pallens* | 1 | 1 | 1 | 34 | 28 | 13 | 3 | 1 | 8.3 | Generalist | Larva |
| Noctuidae | *Mythimna pudorina* | 1 | 1 | 1 | 39 | 27 | 7 | 3 | 0 | 11.4 | Open | Larva |
| Noctuidae | *Mythimna straminea* | 1 | 0 | 0 | 32.5 | 30 | 7 | 3 | 0 | 11.4 | Generalist | Larva |
| Noctuidae | *Mythimna turca* | 0 | 0 | 0 | 40 | 27 | 5 | 3 | 0 | 11.2 | Forest | Larva |
| Noctuidae | *Mythimna unipuncta* | 0 | NA | NA | 38.5 | 29 | 8 | 3 | 0 | 7.2 | Generalist | Egg |
| Noctuidae | *Mythimna vitellina* | 0 | NA | NA | 32.5 | 29 | 10 | 3 | 0 | 9.7 | Generalist | Egg |
| Noctuidae | *Naenia typica* | 0 | 0 | 0 | 41 | 26 | 8 | 3 | 0 | 11.1 | Generalist | Larva |
| Noctuidae | *Noctua comes* | 1 | 1 | 1 | 42.5 | 34 | 8 | 3 | 1 | 9.8 | Generalist | Larva |
| Noctuidae | *Noctua fimbriata* | 1 | 1 | 1 | 56.5 | 35 | 8 | 3 | 2 | 9.8 | Generalist | Larva |
| Noctuidae | *Noctua interjecta* | 1 | 1 | 1 | 32.5 | 25 | 4 | 3 | 1 | 11.8 | Generalist | Larva |
| Noctuidae | *Noctua interposita* | 1 | NA | NA | 42 | 19 | 7 | 3 | 1 | 9.8 | Generalist | Larva |
| Noctuidae | *Noctua janthe* | 1 | 1 | 1 | 42.5 | 26 | 7 | 3 | 1 | 9.4 | Generalist | Larva |
| Noctuidae | *Noctua janthina* | 1 | 1 | 1 | 40 | 30 | 4 | 3 | 0 | 11.8 | Generalist | Larva |
| Noctuidae | *Noctua orbona* | 1 | 0 | 1 | 40 | 32 | 11 | 3 | 1 | 9.8 | Generalist | Larva |
| Noctuidae | *Noctua pronuba* | 1 | 1 | 1 | 54 | 36 | 8 | 3 | 2 | 9.8 | Generalist | Larva |
| Noctuidae | *Nonagria typhae* | 1 | 0 | 0 | 48.5 | 30 | 9 | 1 | 2 | 6.8 | Generalist | Egg |
| Noctuidae | *Nyctobrya muralis* | 0 | NA | NA | 28.5 | 33 | 5 | 3 | 0 | 11.8 | Generalist | Larva |
| Noctuidae | *Ochropleura plecta* | 1 | 1 | 1 | 31 | 32 | 13 | 3 | 0 | 9.5 | Generalist | Larva |
| Noctuidae | *Oligia fasciuncula* | 1 | 1 | 0 | 23 | 24 | 5 | 3 | 0 | 11.2 | Open | Larva |
| Noctuidae | *Oligia latruncula* | 1 | 1 | 1 | 24.5 | 30 | 8 | 3 | 1 | 11.1 | Generalist | Larva |
| Noctuidae | *Oligia strigilis* | 1 | 1 | 1 | 26.5 | 31 | 6 | 3 | 1 | 10.7 | Generalist | Larva |
| Noctuidae | *Oligia versicolor* | 1 | 0 | 0 | 26 | 22 | 7 | 2 | 0 | 11.4 | Forest | Larva |
| Noctuidae | *Opigena polygona* | 0 | 0 | 0 | 38.5 | 24 | 7 | 3 | 0 | 9.4 | Open | Larva |
| Noctuidae | *Orthosia cerasi* | 1 | 1 | 1 | 37 | 32 | 6 | 3 | 0 | 4.5 | Generalist | Pupa |
| Noctuidae | *Orthosia cruda* | 1 | 1 | 1 | 29 | 32 | 6 | 3 | 1 | 4.5 | Forest | Pupa |
| Noctuidae | *Orthosia gothica* | 1 | 1 | 1 | 36 | 33 | 5 | 3 | 2 | 5.0 | Generalist | Pupa |
| Noctuidae | *Orthosia gracilis* | 1 | 0 | 1 | 38.5 | 30 | 4 | 3 | 0 | 5.5 | Generalist | Pupa |
| Noctuidae | *Orthosia incerta* | 1 | 0 | 1 | 39 | 33 | 6 | 3 | 2 | 4.5 | Generalist | Pupa |
| Noctuidae | *Orthosia miniosa* | 1 | 1 | 1 | 34.5 | 32 | 4 | 2 | 1 | 5.5 | Forest | Pupa |
| Noctuidae | *Orthosia opima* | 0 | 0 | 1 | 36.5 | 26 | 5 | 3 | 0 | 5.0 | Forest | Pupa |
| Noctuidae | *Pabulatrix pabulatricula* | 0 | 0 | 0 | 31 | 19 | 4 | 3 | 0 | 11.8 | Forest | Egg |
| Noctuidae | *Pachetra sagittigera* | 0 | 0 | 0 | 41.5 | 31 | 6 | 3 | 0 | 10.7 | Generalist | Larva |
| Noctuidae | *Panemeria tenebrata* | 0 | NA | NA | 20.5 | 29 | 12 | 2 | 0 | 10.7 | Generalist | Pupa |
| Noctuidae | *Panolis flammea* | 0 | 0 | 1 | 35 | 29 | 5 | 2 | 0 | 8.0 | Generalist | Pupa |
| Noctuidae | *Panthea coenobita* | 0 | 0 | 0 | 49 | 23 | 7 | 2 | 0 | 11.4 | Forest | Pupa |
| Noctuidae | *Papestra biren* | 0 | 0 | 0 | 37.5 | 26 | 5 | 3 | 0 | 8.0 | Generalist | Pupa |
| Noctuidae | *Parastichtis suspecta* | 1 | 1 | 0 | 31.5 | 27 | 5 | 3 | 1 | 11.8 | Forest | Egg |
| Noctuidae | *Peridroma saucia* | 0 | NA | NA | 47.5 | 34 | 9 | 3 | 2 | 6.8 | Generalist | Larva |
| Noctuidae | *Phlogophora meticulosa* | 1 | 1 | 1 | 49.5 | 35 | 8 | 3 | 1 | 6.1 | Generalist | Egg |
| Noctuidae | *Photedes captiuncula* | 1 | NA | NA | 18 | 21 | 6 | 3 | 0 | 11.7 | Open | Larva |
| Noctuidae | *Photedes extrema* | 0 | NA | 0 | 26 | 20 | 5 | 1 | 0 | 11.2 | Open | Larva |
| Noctuidae | *Photedes fluxa* | 1 | 0 | 1 | 25 | 26 | 4 | 3 | 1 | 11.8 | Generalist | Larva |
| Noctuidae | *Photedes minima* | 0 | 0 | 1 | 23 | 28 | 7 | 2 | 0 | 11.4 | Generalist | Larva |
| Noctuidae | *Photedes morrisii* | 0 | NA | 0 | 29 | 16 | 4 | 1 | 0 | 11.8 | Open | Larva |
| Noctuidae | *Phragmatiphila nexa* | 0 | NA | 0 | 27.5 | 18 | 6 | 1 | 0 | 8.7 | Generalist | Egg |
| Noctuidae | *Phragmatobia luctifera* | 0 | NA | NA | 37 | 19 | 8 | 3 | 0 | 10.7 | Generalist | Pupa |
| Noctuidae | *Plusia festucae* | 0 | 1 | 0 | 36.5 | 29 | 6 | 3 | 0 | 8.7 | Generalist | Larva |
| Noctuidae | *Plusia putnami* | 0 | 0 | 0 | 35.5 | 20 | 4 | 3 | 0 | 11.8 | Generalist | Larva |
| Noctuidae | *Polia bombycina* | 0 | 0 | 1 | 51.5 | 27 | 7 | 3 | 1 | 11.4 | Generalist | Larva |
| Noctuidae | *Polia hepatica* | 0 | 0 | 0 | 47.5 | 23 | 7 | 3 | 0 | 11.4 | Generalist | Larva |
| Noctuidae | *Polia nebulosa* | 1 | 1 | 0 | 52 | 27 | 4 | 3 | 0 | 11.8 | Generalist | Larva |
| Noctuidae | *Polychrysia moneta* | 0 | 0 | 0 | 42.5 | 25 | 7 | 2 | 0 | 11.4 | Open | Larva |
| Noctuidae | *Polymixis flavicincta* | 0 | NA | NA | 45.5 | 25 | 4 | 2 | 0 | 3.5 | Generalist | Egg |
| Noctuidae | *Polymixis polymita* | 0 | 0 | 0 | 42.5 | 20 | 6 | 3 | 0 | 8.7 | Open | Egg |
| Noctuidae | *Protarchanara brevilinea* | 0 | NA | 0 | 33 | 10 | 5 | 1 | 0 | 11.2 | Generalist | Egg |
| Noctuidae | *Protolampra sobrina* | 0 | 0 | 0 | 36.5 | 22 | 4 | 3 | 0 | 11.8 | Forest | Larva |
| Noctuidae | *Protoschinia scutosa* | 0 | NA | NA | 34 | 28 | 7 | 2 | 0 | 9.4 | Generalist | Pupa |
| Noctuidae | *Proxenus lepigone* | 1 | 0 | 0 | 28.5 | 10 | 4 | 1 | 0 | 8.5 | Generalist | Larva |
| Noctuidae | *Pseudeustrotia candidula* | 0 | NA | NA | 24.5 | 19 | 6 | 3 | 0 | 11.7 | Generalist | Pupa |
| Noctuidae | *Pyrrhia umbra* | 1 | 1 | 1 | 36 | 31 | 8 | 3 | 0 | 11.1 | Generalist | Pupa |
| Noctuidae | *Rhizedra lutosa* | 1 | 1 | 1 | 46.5 | 29 | 6 | 3 | 1 | 4.7 | Generalist | Egg |
| Noctuidae | *Rhyacia simulans* | 0 | 0 | 1 | 42.5 | 31 | 8 | 3 | 0 | 9.8 | Generalist | Larva |
| Noctuidae | *Rusina ferruginea* | 1 | 1 | 1 | 35.5 | 32 | 6 | 3 | 0 | 10.7 | Generalist | Larva |
| Noctuidae | *Sedina buettneri* | 0 | NA | 0 | 32 | 21 | 4 | 1 | 0 | 3.5 | Generalist | Egg |
| Noctuidae | *Senta flammea* | 0 | NA | 0 | 36.5 | 18 | 5 | 3 | 1 | 5.0 | Generalist | Pupa |
| Noctuidae | *Sideridis reticulata* | 1 | 1 | 1 | 37.5 | 29 | 7 | 3 | 0 | 10.1 | Open | Pupa |
| Noctuidae | *Sideridis rivularis* | 1 | 0 | 0 | 31.5 | 29 | 12 | 2 | 0 | 9.3 | Open | Pupa |
| Noctuidae | *Sideridis turbida* | 1 | 0 | 1 | 39.5 | 27 | 7 | 3 | 0 | 10.1 | Generalist | Pupa |
| Noctuidae | *Simyra nervosa* | 0 | NA | NA | 31.5 | 16 | 16 | 2 | 1 | 11.7 | Open | Pupa |
| Noctuidae | *Spaelotis ravida* | 0 | 1 | 1 | 46 | 28 | 9 | 3 | 0 | 9.9 | Open | Larva |
| Noctuidae | *Spaelotis suecica* | 0 | NA | NA | 37.5 | 13 | 10 | 3 | 0 | 9.9 | Open | Larva |
| Noctuidae | *Spodoptera exigua* | 0 | NA | NA | 29 | 34 | 10 | 3 | 0 | 7.5 | Generalist | Larva |
| Noctuidae | *Standfussiana lucernea* | 0 | 0 | 0 | 41.5 | 23 | 8 | 2 | 0 | 9.8 | Generalist | Larva |
| Noctuidae | *Staurophora celsia* | 0 | 1 | 0 | 39.5 | 17 | 4 | 3 | 0 | 7.3 | Open | Egg |
| Noctuidae | *Syngrapha interrogationis* | 0 | 1 | 0 | 36 | 25 | 6 | 3 | 0 | 11.7 | Generalist | Larva |
| Noctuidae | *Syngrapha microgamma* | 0 | 0 | 0 | 27.5 | 11 | 4 | 3 | 0 | 8.5 | Generalist | Larva |
| Noctuidae | *Thalpophila matura* | 1 | 0 | 1 | 38.5 | 32 | 4 | 3 | 1 | 11.8 | Open | Larva |
| Noctuidae | *Tholera cespitis* | 0 | 0 | 0 | 36 | 29 | 5 | 3 | 0 | 8.0 | Open | Egg |
| Noctuidae | *Tholera decimalis* | 0 | 0 | 0 | 40 | 31 | 5 | 3 | 0 | 8.0 | Open | Egg |
| Noctuidae | *Tiliacea aurago* | 0 | 0 | 0 | 36 | 28 | 5 | 2 | 1 | 7.3 | Forest | Egg |
| Noctuidae | *Tiliacea citrago* | 0 | 0 | 0 | 36 | 26 | 4 | 1 | 1 | 7.3 | Forest | Egg |
| Noctuidae | *Tiliacea sulphurago* | 0 | NA | NA | 34 | 18 | 5 | 2 | 0 | 8.7 | Forest | Egg |
| Noctuidae | *Trachea atriplicis* | 1 | 1 | 1 | 38.5 | 30 | 8 | 3 | 0 | 11.1 | Generalist | Pupa |
| Noctuidae | *Trichoplusia ni* | 0 | NA | NA | 34 | 31 | 15 | 2 | 0 | 9.9 | Generalist | Larva |
| Noctuidae | *Trichosea ludifica* | 0 | NA | NA | 41 | 18 | 4 | 1 | 0 | 11.4 | Generalist | Pupa |
| Noctuidae | *Tyta luctuosa* | 0 | 1 | 0 | 24 | 33 | 9 | 2 | 0 | 10.8 | Open | Larva |
| Noctuidae | *Xanthia togata* | 0 | 0 | 0 | 32.5 | 29 | 7 | 3 | 0 | 5.4 | Generalist | Egg |
| Noctuidae | *Xestia alpicola* | 0 | 0 | 0 | 38 | 18 | 4 | 3 | 0 | 11.8 | Forest | Larva |
| Noctuidae | *Xestia ashworthii* | 0 | 0 | 0 | 37.5 | 24 | 8 | 3 | 2 | 11.1 | Open | Larva |
| Noctuidae | *Xestia baja* | 1 | 1 | 1 | 41 | 29 | 6 | 3 | 0 | 11.7 | Generalist | Larva |
| Noctuidae | *Xestia castanea* | 0 | 0 | 0 | 37 | 28 | 6 | 3 | 1 | 8.7 | Open | Larva |
| Noctuidae | *Xestia c-nigrum* | 1 | 1 | 1 | 37 | 35 | 16 | 3 | 1 | 8.3 | Generalist | Larva |
| Noctuidae | *Xestia ditrapezium* | 1 | NA | NA | 42 | 26 | 5 | 3 | 0 | 11.4 | Generalist | Larva |
| Noctuidae | *Xestia sexstrigata* | 1 | 1 | 0 | 36.5 | 23 | 4 | 3 | 0 | 11.8 | Forest | Larva |
| Noctuidae | *Xestia speciosa* | 0 | 0 | 0 | 41 | 18 | 7 | 3 | 1 | 9.4 | Forest | Larva |
| Noctuidae | *Xestia triangulum* | 1 | 1 | 1 | 41 | 25 | 7 | 3 | 0 | 11.4 | Generalist | Larva |
| Noctuidae | *Xestia xanthographa* | 1 | 1 | 1 | 36 | 34 | 6 | 3 | 2 | 8.7 | Generalist | Larva |
| Noctuidae | *Xylena exsoleta* | 0 | 0 | 0 | 62.5 | 31 | 11 | 3 | 0 | 4.3 | Open | Imago |
| Noctuidae | *Xylena solidaginis* | 0 | 0 | 0 | 47.5 | 22 | 8 | 3 | 1 | 6.1 | Generalist | Egg |
| Noctuidae | *Xylena vetusta* | 0 | 0 | 1 | 58.5 | 30 | 12 | 3 | 0 | 4.6 | Generalist | Imago |
| Noctuidae | *Xylocampa areola* | 0 | NA | 0 | 35.5 | 20 | 6 | 1 | 0 | 4.5 | Open | Pupa |
| Nolidae | *Bena bicolorana* | 1 | 0 | 1 | 45 | 32 | 7 | 2 | 0 | 11.4 | Forest | Larva |
| Nolidae | *Earias clorana* | 1 | 0 | 0 | 21.5 | 33 | 9 | 2 | 0 | 10.8 | Generalist | Pupa |
| Nolidae | *Earias vernana* | 0 | NA | 0 | 21.5 | 24 | 8 | 1 | 0 | 11.1 | Generalist | Pupa |
| Nolidae | *Meganola albula* | 0 | 0 | 0 | 21 | 25 | 6 | 3 | 1 | 11.7 | Generalist | Larva |
| Nolidae | *Meganola strigula* | 0 | 0 | 0 | 21 | 30 | 4 | 2 | 0 | 11.8 | Forest | Larva |
| Nolidae | *Nola aerugula* | 0 | 0 | 0 | 17 | 25 | 6 | 3 | 2 | 11.7 | Generalist | Larva |
| Nolidae | *Nola confusalis* | 0 | 0 | 0 | 19 | 27 | 6 | 3 | 0 | 7.5 | Forest | Pupa |
| Nolidae | *Nola cucullatella* | 0 | 0 | 1 | 18 | 26 | 6 | 3 | 1 | 11.7 | Forest | Larva |
| Nolidae | *Nycteola degenerana* | 0 | 0 | 0 | 25.5 | 23 | 13 | 3 | 1 | 8.5 | Forest | Imago |
| Nolidae | *Nycteola revayana* | 0 | 0 | 1 | 24 | 32 | 13 | 2 | 2 | 8.5 | Forest | Imago |
| Nolidae | *Pseudoips prasinana* | 0 | 0 | 0 | 39 | 31 | 7 | 3 | 0 | 10.1 | Forest | Pupa |
| Notodontidae | *Cerura erminea* | 0 | NA | NA | 67 | 20 | 8 | 2 | 0 | 9.1 | Generalist | Pupa |
| Notodontidae | *Cerura vinula* | 0 | 0 | 0 | 60 | 32 | 9 | 3 | 1 | 9.1 | Generalist | Pupa |
| Notodontidae | *Clostera anachoreta* | 0 | 0 | 0 | 30 | 29 | 5 | 2 | 0 | 8.0 | Forest | Pupa |
| Notodontidae | *Clostera anastomosis* | 0 | 0 | 0 | 37 | 26 | 5 | 2 | 1 | 11.2 | Forest | Larva |
| Notodontidae | *Clostera curtula* | 0 | 0 | 1 | 32 | 28 | 9 | 3 | 0 | 9.7 | Forest | Pupa |
| Notodontidae | *Clostera pigra* | 0 | 0 | 0 | 24.5 | 29 | 10 | 3 | 0 | 8.6 | Forest | Pupa |
| Notodontidae | *Drymonia dodonaea* | 0 | 1 | 0 | 37.5 | 29 | 8 | 3 | 0 | 9.6 | Forest | Pupa |
| Notodontidae | *Drymonia obliterata* | 0 | NA | NA | 35 | 15 | 8 | 2 | 1 | 4.5 | Forest | Pupa |
| Notodontidae | *Drymonia querna* | 0 | NA | NA | 40.5 | 21 | 16 | 2 | 0 | 9.6 | Generalist | Pupa |
| Notodontidae | *Drymonia ruficornis* | 0 | 0 | 0 | 39 | 30 | 6 | 2 | 0 | 4.5 | Forest | Pupa |
| Notodontidae | *Drymonia velitaris* | 0 | NA | NA | 37.5 | 18 | 8 | 2 | 0 | 7.3 | Generalist | Pupa |
| Notodontidae | *Furcula bicuspis* | 1 | 0 | 0 | 36.5 | 25 | 5 | 3 | 0 | 8.0 | Forest | Pupa |
| Notodontidae | *Furcula bifida* | 0 | 0 | 0 | 36 | 33 | 8 | 3 | 0 | 9.6 | Forest | Pupa |
| Notodontidae | *Furcula furcula* | 1 | 1 | 0 | 32.5 | 30 | 8 | 3 | 0 | 10.6 | Generalist | Pupa |
| Notodontidae | *Gluphisia crenata* | 0 | 1 | 0 | 30.5 | 25 | 7 | 3 | 1 | 10.1 | Forest | Pupa |
| Notodontidae | *Harpyia milhauseri* | 1 | 0 | 0 | 49 | 29 | 7 | 2 | 0 | 10.1 | Forest | Pupa |
| Notodontidae | *Leucodonta bicoloria* | 0 | 0 | 0 | 37 | 23 | 8 | 2 | 0 | 9.6 | Forest | Pupa |
| Notodontidae | *Notodonta dromedarius* | 1 | 1 | 1 | 41.5 | 28 | 10 | 3 | 1 | 9.9 | Forest | Pupa |
| Notodontidae | *Notodonta torva* | 0 | 0 | 0 | 42.5 | 23 | 10 | 2 | 0 | 9.2 | Forest | Pupa |
| Notodontidae | *Notodonta tritophus* | 1 | 0 | 0 | 47.5 | 27 | 10 | 2 | 1 | 9.2 | Forest | Pupa |
| Notodontidae | *Notodonta ziczac* | 1 | 1 | 0 | 40 | 32 | 12 | 3 | 0 | 8.8 | Generalist | Pupa |
| Notodontidae | *Odontosia carmelita* | 0 | 0 | 0 | 42 | 24 | 5 | 3 | 0 | 5.0 | Generalist | Pupa |
| Notodontidae | *Odontosia sieversii* | 0 | 0 | 0 | 44 | 10 | 6 | 2 | 1 | 4.5 | Forest | Pupa |
| Notodontidae | *Peridea anceps* | 0 | 0 | 0 | 58.5 | 30 | 6 | 2 | 1 | 7.5 | Forest | Pupa |
| Notodontidae | *Phalera bucephala* | 1 | 0 | 0 | 55 | 33 | 8 | 3 | 0 | 11.1 | Generalist | Pupa |
| Notodontidae | *Pheosia gnoma* | 1 | 1 | 0 | 42.5 | 26 | 10 | 2 | 1 | 9.9 | Generalist | Pupa |
| Notodontidae | *Pheosia tremula* | 1 | 1 | 0 | 48.5 | 28 | 11 | 2 | 0 | 9.5 | Generalist | Pupa |
| Notodontidae | *Pterostoma palpina* | 1 | 0 | 1 | 45 | 33 | 11 | 3 | 1 | 10.0 | Generalist | Pupa |
| Notodontidae | *Ptilodon capucina* | 0 | 0 | 0 | 40 | 29 | 11 | 3 | 1 | 10.0 | Forest | Pupa |
| Notodontidae | *Ptilodon cucullina* | 1 | NA | NA | 40 | 23 | 8 | 2 | 1 | 10.0 | Generalist | Pupa |
| Notodontidae | *Ptilophora plumigera* | 0 | 0 | 1 | 37 | 25 | 2 | 1 | 1 | 2.5 | Forest | Egg |
| Notodontidae | *Pygaera timon* | NA | 0 | NA | 40 | 9 | 5 | 2 | 0 | 8.0 | Forest | Pupa |
| Notodontidae | *Spatalia argentina* | 0 | NA | NA | 36.5 | 17 | 8 | 2 | 1 | 11.7 | Generalist | Pupa |
| Notodontidae | *Stauropus fagi* | 0 | 0 | 0 | 57 | 32 | 11 | 3 | 0 | 10.0 | Forest | Pupa |
| Notodontidae | *Thaumetopoea pinivora* | 0 | 0 | 0 | 35 | 9 | 7 | 2 | 0 | 9.4 | Forest | Larva |
| Notodontidae | *Thaumetopoea processionea* | 1 | NA | NA | 36 | 20 | 12 | 1 | 0 | 9.4 | Forest | Egg |
| Saturniidae | *Aglia tau* | 0 | 0 | 0 | 70 | 25 | 5 | 2 | 0 | 8.0 | Forest | Pupa |
| Saturniidae | *Saturnia pavonia* | 0 | 0 | 0 | 56 | 32 | 8 | 3 | 0 | 6.5 | Generalist | Pupa |
| Sphingidae | *Acherontia atropos* | 0 | NA | NA | 122.5 | 36 | 10 | 2 | 1 | 6.8 | Generalist | Pupa |
| Sphingidae | *Agrius convolvuli* | 0 | NA | NA | 109 | 36 | 9 | 2 | 0 | 7.1 | Generalist | Pupa |
| Sphingidae | *Deilephila elpenor* | 1 | 1 | 1 | 60 | 33 | 10 | 3 | 0 | 10.4 | Generalist | Pupa |
| Sphingidae | *Deilephila porcellus* | 0 | 1 | 1 | 47.5 | 32 | 11 | 2 | 0 | 10.0 | Open | Pupa |
| Sphingidae | *Hemaris fuciformis* | 0 | 0 | 0 | 42.5 | 31 | 8 | 2 | 0 | 9.6 | Open | Pupa |
| Sphingidae | *Hemaris tityus* | 0 | 0 | 0 | 40.5 | 31 | 11 | 1 | 0 | 10.0 | Open | Pupa |
| Sphingidae | *Hyles euphorbiae* | 0 | NA | NA | 70 | 31 | 5 | 1 | 0 | 11.2 | Generalist | Egg |
| Sphingidae | *Hyles gallii* | 0 | 1 | 0 | 70 | 31 | 8 | 2 | 0 | 11.1 | Generalist | Pupa |
| Sphingidae | *Hyles livornica* | 0 | NA | NA | 80 | 33 | 12 | 3 | 0 | 11.2 | Generalist | Egg |
| Sphingidae | *Laothoe populi* | 0 | 0 | 1 | 73.5 | 32 | 11 | 3 | 1 | 10.0 | Generalist | Pupa |
| Sphingidae | *Macroglossum stellatarum* | 0 | NA | NA | 47.5 | 36 | 7 | 2 | 1 | 9.4 | Generalist | Imago |
| Sphingidae | *Mimas tiliae* | 1 | 1 | 1 | 63.5 | 30 | 8 | 2 | 2 | 9.6 | Forest | Pupa |
| Sphingidae | *Proserpinus proserpina* | 0 | NA | NA | 46.5 | 23 | 6 | 2 | 0 | 8.8 | Open | Pupa |
| Sphingidae | *Smerinthus ocellata* | 1 | 1 | 0 | 77.5 | 32 | 8 | 3 | 0 | 9.6 | Forest | Pupa |
| Sphingidae | *Sphinx ligustri* | 1 | 0 | 0 | 105 | 32 | 6 | 2 | 0 | 10.7 | Generalist | Pupa |
| Sphingidae | *Sphinx pinastri* | 1 | 1 | 0 | 79 | 31 | 13 | 2 | 0 | 9.5 | Forest | Pupa |

**Description of the trait variables**

*Temperature preference.* We calculated the average temperature during the adult activity period for each species by using information on the adult activity period extracted from Svensson [1]. We used weekly averaged data in southern Sweden (Skåne) based on online data (www.smhi.se) from 20 weather stations across the province [see 2] for the period 1990-2010 and daily average temperature data to calculate an adult temperature index (mean temperature) for each species. For the weeks each species was known to be active as an adult, we extracted the average daily mean temperatures and calculated a mean temperature for the whole flight period. Despite the potential drawbacks of this approach, we are confident that the temperature values are valid across northern Europe, especially when considered as relative values and not degrees Celsius per se. We treated the variable as a continuous variable in the statistical analysis. The three studied regions have a similar climate and the moth species are expected to have a similar activity period in all three cities, e.g. cold adapted species will start to fly before warm adapted species in each of our three study areas [1, 3].

*Length of reproductive season.* The average length of the adult flight period, in weeks, in southern Sweden was estimated for each species [1, 3]. Reproductive potential is associated with the adult life-span of a species [4]. For species with two or multiple generations per year, we summed the flight periods. We treated length of the reproductive season as a continuous variable.

*Range size.* To quantify range size, we determined the number of European countries in which the species have been recorded according to Karsholt and Razowski [5]. We used the number of European countries because this is the most homogenous dataset available across all taxonomic groups of butterflies and moths [6]. We treated the range size variable as a continuous variable.

*Body size.* To quantify body size, we collected information on male wingspan (mm) from the literature [3, 7, 8]. Body size is an important trait used as a proxy for metabolic costs and resource use [9], and also suggested as a proxy for dispersal [10-13]. We treated the body size as a continuous variable.

*Habitat use.* Each species was classified with regards to habitat use as belonging to one of three classes: species with a preference for open habitats (grasslands, wetlands, and other open areas including shrub and brushwood habitats, *n*  = 198), species with a preference for forest habitats (*n*  =  259) and habitat generalists (species occurring in all habitats, *n*  =  401). The information on habitat use was extracted from the literature [3, 7, 14-16]. We treated habitat use as a discrete variable.

*Dietary breadth.* Larvae dietary breadth was classified into three classes: specialist species that feed mainly on a single plant species (*n*  =  103), oligophagous species that feed on a few plant species (less than six or restricted to a particular plant genus/family; *n*  =  292), and generalist species that feed on several (six or more) different plant species or genera (*n*  =  463). Information about food plants was extracted from the literature [3, 7, 14-16]. We treated dietary breadth as an ordinal (continuous) variable.

*Colour pattern variation.* All species were classified with regards to intraspecific variation in colour pattern. Species within which there is no apparent variation between individuals in colour and/or patterning of the wings were classified as non-variable (*n*  =  516); species in which individuals vary either in the size, shape, or colouration of pattern elements were classified as variable (*n*  =  266); and species in which individuals vary considerably in size, shape, and colouration of pattern elements or with regard to presence/absence of pattern elements were classified as highly variable (*n*  =  76) [6, 17]. Species that were sexually dichromatic were classified as having variable colouration only if variation was apparent within one or both sexes, otherwise they were considered non-variable. If the classifications differed between authors, identification books and collections were studied before the final classification was made. We treated colour pattern variation as an ordinal (continuous) variable. Results from a previous comparative analysis across > 400 species of Noctuid moths indicate that intraspecific variation in colour pattern is associated with multidimensional variation in morphological, behavioural and life-history traits, thus offering a proxy of niche breadth and ecological generalization [18].

*Overwintering life-stage.* All species were classified for overwintering life-stage into one of four categories: egg (*n*  =  154), larva (*n*  =  315), pupa (*n*  =  368) or imago (*n*  =  21) [1, 3, 7].

**Pre-exploration and selection of predictors**

Given that we study eight predictor traits, it is important to evaluate any potential redundancy among these predictors to avoid model instability and degradation in predictive performance [19]. Redundancy among predictors exists in two forms: pairwise correlation and multi-collinearity. While correlations measure the degree of association between pairs of variables, multi-collinearity refers to the situation when there is a concurrent relationship between multiple variables, i.e. when some variables can be predicted from a combination of other variables. In this study, we pre-process the set of predictor variables by applying correlation and multi-collinearity analyses as follows:

**1. Correlation analysis:** We used the function Varclus in the Hmisc package in R [20, 21] to analyse correlations among the predictor variables. Varclus is a hierarchical approach that depicts variables in clusters, each of which is associated with a correlation level. We considered Spearman rank correlation (ρ) such that, for each cluster with |ρ| > 0.7, we selected one variable and discard all the rest (figure S1).


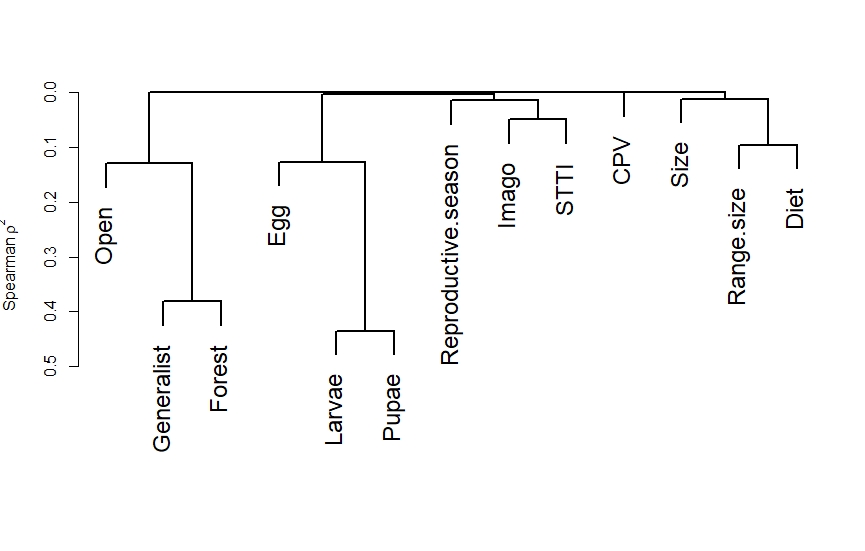


**Electronic supplementary Figure S1**. The correlation analysis showed no strong correlations between the eight predictor variables (species traits). Size = Body size, Diet = Dietary breadth, CPV = Colour pattern variation, STTI = Temperature preference, (Open, Forest, Generalist) = Habitat use and (Egg, Larvae, Pupae) = Overwintering life-stage.

**2. Multi-collinearity analysis:** The variables retained from the previous step were analysed further to check for potential multi-collinearity. We performed such an analysis by considering how well each variable could be predicted by the other variables. Variables that are highly predictable are discarded in an iterative fashion until all remaining variables exhibit low levels of redundancy. Specifically, we quantified the predictability of a particular variable v by fitting a linear regression model that uses v as response and the other variables as predictors. We then used the adjusted coefficient of determination R2, which represents the goodness of fit, to measure the predictability of v. Therefore, in each iteration, we computed the R2 for all variables and dropped the one associated with the highest value. This process was repeated until all the R2 values were below a cut-off threshold. This approach was implemented via function redun provided by the Hmisc package in R, which uses a default cut-off threshold of 0.9. The variance inflating factor (VIF) is calculated as 1/(1-R2) and used to prove that the predictors do not correlate among each other. Our R2 and VIF values showed no indication of redundancy among predictor variables and the highest R2 value was 0.692 corresponding to a VIF value of 3.25 for species with no colour pattern variation [22] (table S2).

**Electronic supplementary table S2**. Multi-collinearity analysis and the R2 and VIF values with which each variable can be predicted from all other variables.

| **Variable** | **R2** | **VIF-value** |
| --- | --- | --- |
| Species temperature preference | 0.315 | 1.46 |
| Colour pattern variation = 0 | 0.692 | 3.25 |
| Colour pattern variation = 1 | 0.687 | 3.19 |
| Dietary breadth = 2 | 0.622 | 2.65 |
| Dietary breadth = 3 | 0.670 | 3.03 |
| Length of reproductive season | 0.216 | 1.28 |
| Body size | 0.108 | 1.12 |
| Habitat Forest | 0.221 | 1.28 |
| Habitat Open | 0.205 | 1.26 |
| Overwintering Larvae | 0.598 | 2.49 |
| Overwintering Pupae | 0.533 | 2.14 |
| Overwintering Imago | 0.211 | 1.27 |
| Range size | 0.135 | 1.16 |


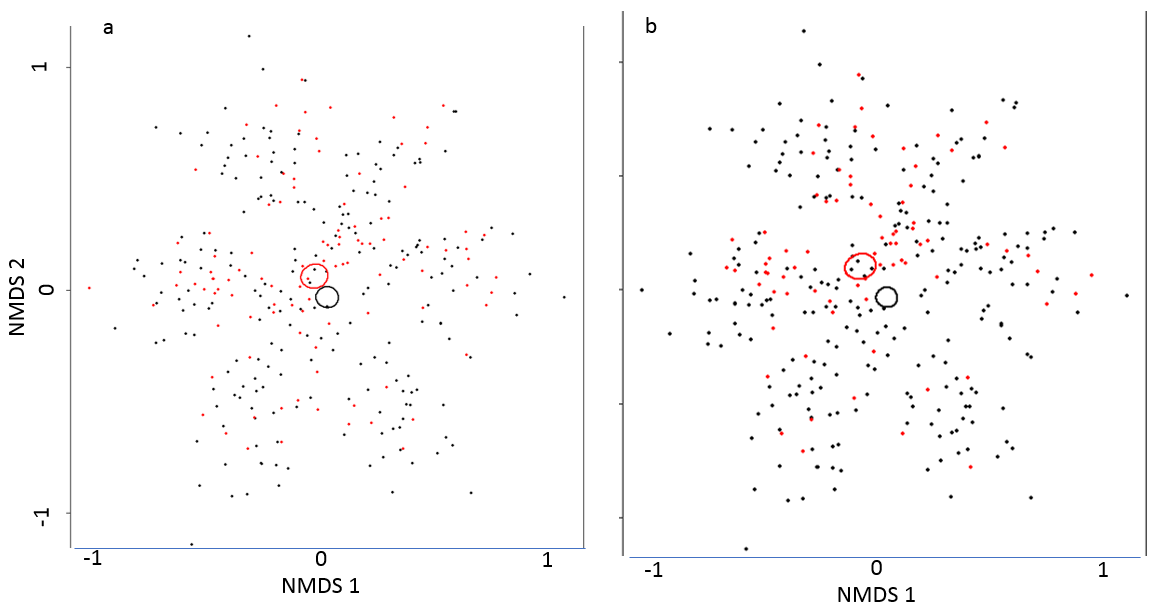


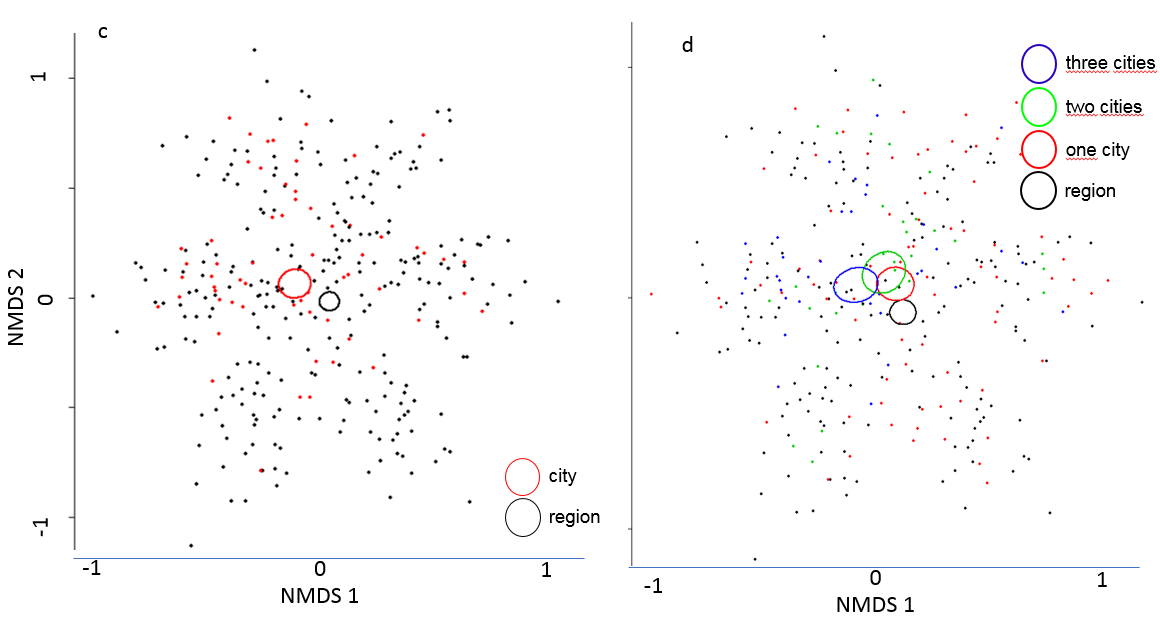


**Electronic supplementary Figure S2.** Ordination diagram using nonmetric multidimensional scaling (NMDS) to visualize urban filtering of moth communities and how they are distributed in multidimensional space given their eight ecological traits. The figure illustrates if species were caught in cities (red dots and red circles) or were only present in a regional species pool of potential colonizers (black dots and black circles) in relation to the eight traits (see description of the trait variables above). Cirlcles representing the 95% confidence intervals. The species composition of moths in (a) Halle/Sachsen-Anhalt (stress = 0.136), (b) Lund/ Skåne (stress = 0.113), (c) Kalmar/County of Kalmar (0.108), and (d) the number of occupied cities in relation to the distribution of the eight traits (stress = 0.162). The NMDS measure the goodness of fit using stress, which relates pairwise distances between objects in reduced ordination space to their dissimilarities in full variable space. As a rule of thumb: stress > 0.05 provides an excellent representation in reduced dimensions, > 0.1 is great, >0.2 is ok, and stress > 0.3 provides a poor representation [23].

| **Electronic supplementary table S3.** Frequency (%) for categorical variables and their trait states) of moth species caught in urban environments and present in the surrounding region for three cities/regions in northern Europe. *N* = number of species. | | | | | | |
| --- | --- | --- | --- | --- | --- | --- |
|  | **Halle** |  | **Kalmar** |  | **Lund** |  |
|  | Present | Absent | Present | Absent | Present | Absent |
| **Traits** | *n* = 286 | *n* = 567 | *n* = 178 | *n* = 518 | *n* = 215 | *n* = 503 |
| Habitat Generalist (%) | 41 | 59 | 38 | 62 | 43 | 57 |
| Forest (%) | 31 | 69 | 15 | 85 | 23 | 77 |
| Open (%) | 23 | 77 | 17 | 83 | 16 | 84 |
| Overwintering Egg (%) | 34 | 66 | 23 | 77 | 32 | 68 |
| Imago (%) | 29 | 71 | 24 | 76 | 35 | 65 |
| Larvae (%) | 36 | 64 | 30 | 70 | 34 | 66 |
| Pupae (%) | 32 | 68 | 23 | 77 | 25 | 75 |

**Supplementary references**

1. Svensson I. 1993 *Lepidoptera-calender*. Stockholm, Hans Hellberg; 1-124 p.

2. Alexandersson H. 2002 *Temperatur och nederbörd i Sverige 1860 -2001*. Norrköping, SMHI.

3. Ebert G. 2003 *Die Schmetterlinge Baden-Württembergs, band 1-10*. Stuttgart, Ulmer.

4. Öckinger E., Schweiger O., Crist T.O., Debinski D.M., Krauss J., Kuussaari M., Petersen J.D., Pöyry J., Settele J., Summerville K.S., et al. 2010 Life-history traits predict species responses to habitat area and isolation: a cross-continental synthesis. *Ecology Letters* **13**, 969-979.

5. Karsholt O., Razowski J. 1996 *The Lepidoptera of Europe - a distributional checklist*. Stenstrup, Apollo books; 1-380 p.

6. Franzén M., Forsman A., Betzholtz P.-E. 2019 Variable color patterns influence continental range size and species–area relationships on islands. *Ecosphere* **10**. (doi:e02577. 10.1002/ecs2.2577).

7. Emmet A.M. 1991 Life history and habits of the British Lepidoptera. In *The moths and butterflies of Great Britain and Ireland* (eds. Emmet A.M., Heath J.), pp. 61-203. Colchester, Harley Books.

8. Huldén L., Albrecht A., Itämies J., Malinen P., Wettenhovi J. 2000 *Atlas of Finnish Macrolepidoptera*. Helsingfors, Lepidopterologiska sällskapet i Finland.

9. Bueno J., Lopez-Urrutia A. 2012 The offspring-development-time/offspring-number trade-off. *American Naturalist* **179**(6), E196-E203. (doi:10.1086/665652).

10. Stevens V.M., Turlure C., Baguette M. 2010 A meta-analysis of dispersal in butterflies. *Biological reviews (Cambridge)* **85**(3), 625-642.

11. Nieminen M., Rita H., Uuvana P. 1999 Body size and migration rate in moths. *Ecography* **22**(6), 697-707.

12. Sekar S. 2012 A meta-analysis of the traits affecting dispersal ability in butterflies: can wingspan be used as a proxy? *Journal of Animal Ecology* **81**, 174-184.

13. Slade E.M., Merckx T., Riutta T., Bebber D.P., Redhead D., Riordan P., Macdonald D.W. 2013 Life-history traits and landscape characteristics predict macro-moth responses to forest fragmentation. *Ecology* **94**(7), 1519-1530.

14. Skou P. 1984 *Nordens Målare. Danmarks dyreliv. Bind 2*. Stenstrup, Apollo Books.

15. Skou P. 1991 *Nordens ugler*. Stenstrup, Apollo Books.

16. Hydén N. 2007 *Nationalnyckeln till Sveriges flora och fauna. Fjärilar. Ädelspinnare - tofsspinnare: Lepidoptera: Lasiocampidae - Lymantriidae*. Uppsala, Artdatabanken, SLU.

17. Forsman A., Betzholtz P.-E., Franzén M. 2015 Variable coloration is associated with dampened population fluctuations in noctuid moths. *Proceedings of the Royal Society B* **282**. (doi:10.1098/rspb.2014.2922).

18. Forsman A., Polic D., Sunde J., Betzholtz P.-E., Franzén M. 2020 Variable colour patterns indicate multidimensional, intraspecific trait variation and ecological generalization in moths. *Ecography* **43**, 1-11. (doi:10.1111/ecog.04923).

19. Kuhn M., Johnson K. 2013 *Applied predictive modeling*, Springer.

20. Sarle W. 1990 The VARCLUS Procedure. SAS/STAT User's Guide.

21. R Core Team. 2018 *R: A language and environment for statistical computing. Version 3.5.0*. Vienna, Austria, R Foundation for Statistical Computing.

22. O'Brien R. 2007 A caution regarding rules of thumb for variance inflation factors. *Quality & Quantity* **41**, 673-690. (doi:10.1007/s11135-006-9018-6).

23. Borg I., Groenen P.J.F. 2005 *Modern Multidimensional Scaling: Theory and Applications*, Springer New York.
